# Supplementary material for: Convergent synthesis and optical properties of near-infrared emitting bioluminescent infra-luciferins
Source: PubMed Central journal article supplement (PMC5361108; doi:10.1039/c6ra19541e), 2017-01-16
Supplement: RA-007-C6RA19541E-s001.pdf [file RA-007-C6RA19541E-s001.pdf]

## **A Convergent Synthesis and Optical Properties of Near-infrared Emitting Bioluminescent Infra-luciferins**

James C. Anderson,\* Helen Grounds, Amit P. Jathoul, James A. H. Murray, Steven J. Pacman and  
Laurence Tisi

### **Supplementary Information**

#### **Index**

General experimental

Biological materials and methods

Copies of  $^1\text{H}$ ,  $^{13}\text{C}$ ,  $^{31}\text{P}$  NMR spectra: **8, 9, 10, 11, 12, 6, 4, 13, 14, 15, 16, 5**

## General Experimental Details

All manipulations were routinely carried out under an inert (Ar or N<sub>2</sub>) atmosphere. Cooling to 0 °C was effected using an ice-water bath. Cooling to temperatures below 0 °C was effected using dry ice-acetone mixtures. For the purposes of thin layer chromatography (tlc), Merck silica-aluminium plates were used, with *uv* light (254 nm) and potassium permanganate or anisaldehyde for visualisation. For column chromatography Merck Geduran® Si 60 silica gel was used. Butyl lithium solutions were standardised with diphenyl acetic acid.

All reagents were used as received unless stated. Anhydrous solvents (THF, DCM, MeCN) were obtained from a solvent tower, where degassed solvent was passed through two columns of activated alumina and a 7 micron filter under 4 bar pressure. 6-( $\beta$ -Methoxyethoxymethylether)benzothiazole and ethyl *O,O*-diethylphosphonodithioacetate (**8**) were synthesised according to the published procedures.<sup>1, 2</sup>

Melting points are uncorrected and were recorded on a Griffin melting point machine. All NMR data was collected using a Bruker AMX 300 MHz or a Bruker AVANCE III 600 MHz as stated. All chemical shifts ( $\delta$ ) are reported in parts per million (ppm) relative to residual solvent peaks. Reference values for residual solvents were taken as  $\delta$  = 7.27 (CDCl<sub>3</sub>), 2.51 (DMSO -*d*6), 3.30 (MeOD- *d*4) ppm for <sup>1</sup>H NMR and  $\delta$  = 77.2 (CDCl<sub>3</sub>), 39.5 (DMSO -*d*6), 49.0 (MeOD- *d*4) ppm for <sup>13</sup>C NMR. Coupling constants (*J*) are reported in Hertz and are recorded as observed in the spectrum without averaging. Infrared spectra were recorded using a Bruker Alpha ATR spectrometer. Mass spectrometry data was collected on a Micromass LCT Premier XE (ESI) or Thermo Finnigan Mat900xp (EI/CI) instrument.

## Biological materials and methods

### Optical properties

**Fluorescence quantum yields of analogues (Table 1).** Fluorescence spectra of 50uM analogues were measured as above and furthermore, the emission of 1uM Eosin Yellow dye (BDH Lab Supplies, Poole, UK) in basic ethanol was measured at an excitation wavelength of 490nm. Furthermore, absorption readings of 50uM analogues were also measured and used to derive fluorescence quantum yields<sup>3</sup> of analogues at pH 7.8 in TEM buffer.

**pH dependence of fluorescence spectra of D-luciferin (1) and analogues 4 and 5 (Fig 3).** 10mg/ml analogues in 50% DMSO were dissolved in 500ul TEM buffer (pH 7.8) for concentrations of 500uM

each. They were further diluted to 50uM in different solutions of TEM of differing pH values (pH 6.3, 6.8, 7.3, 7.8, 8.3, 8.8 & 9.3). The solutions were checked for pH after being made up with analogues (values displayed in data). Data were acquired in 2 instruments: the Varian Cary Eclipse Spectrofluorometer and also the Tecan Infinite M200 Spectrofluorometer in triplicate of triplicates on each machine.

#### **Bioluminescence specific activities of luciferin analogues with wild-type firefly luciferase (Fig 4).**

Bioluminescence assays were conducted using the PhotonIMAGER Optima (Biospace Labs, Paris, France) at 26-28°C. 50ul of 6mM ATP was dispensed onto 50ul substrates mixed with different luciferases in triplicate. Experiments were carried out several times with 0.05uM enzymes for native luciferin and 0.5uM enzymes for analogues.

**Bioluminescence spectra of wild-type luciferase enzymes with luciferin and analogues.** 1-10mM enzymes were used to determine bioluminescence spectra with luciferin and analogues at differing pH. The spectrum of Eosin Yellow in basic ethanol was compared to the absolute spectrum<sup>4</sup> to correct spectra for PMT sensitivity.

#### **References**

- 1) E. Pfund, T. Lequeux, S. Masson and M. Vazeux, *Org. Lett.*, 2002, **4**, 843.
- 2) C. S. Marvel, P. de Radzitzky and J. J. Brader, *J. Am. Chem. Soc.*, 1955, **77**, 5997.
- 3) *Principles of Fluorescence Spectroscopy*, Editor: Joseph R. Lakowicz, Springer US, 2006. ISBN: 978-0-387-31278-1.
- 4) <http://omlc.org/spectra/PhotochemCAD/html/061.html> (accessed June 2016)

sp139-3-cosy  
 PROTON.ucl CDC13 {C:\Bruker\TOPSPIN} jca 15

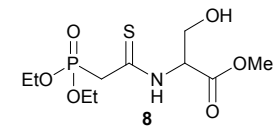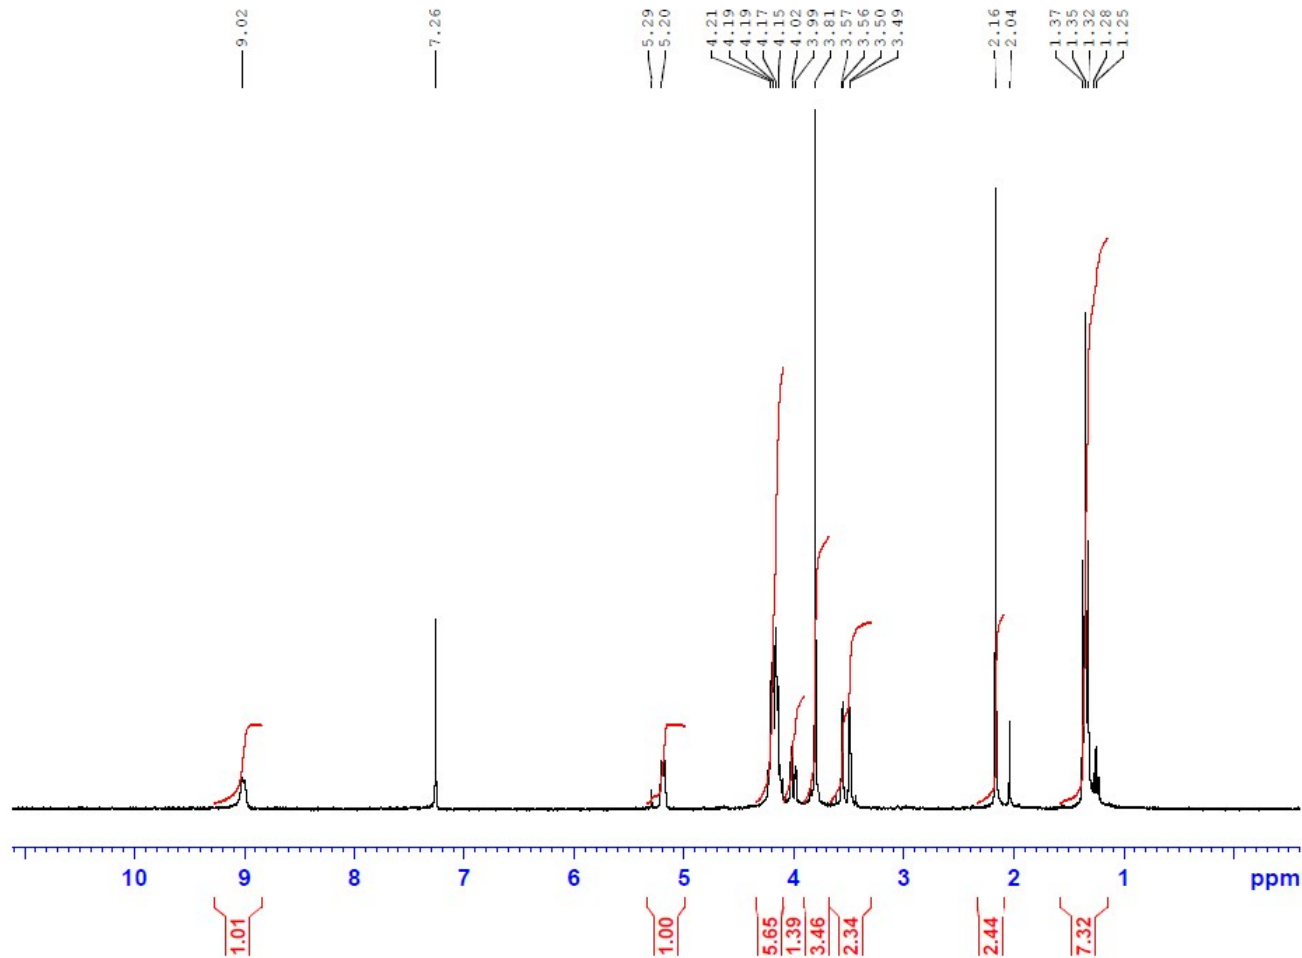

```

Current Data Parameters
NAME      sp139-3-cosy
EXPNO     15
PROCNO    1

F2 - Acquisition Parameters
Date_     20150724
Time      11.05
INSTRUM   spect
PROBHD    5 mm QNP 1H/13
PULPROG   zg30
TD         49382
SOLVENT   CDCl3
NS         4
DS         0
SWH        6172.839 Hz
FIDRES     0.125002 Hz
AQ         3.9999421 sec
RG         2580.3
DW         81.000 usec
DE         6.50 usec
TE         298.4 K
D1         1.00000000 sec
TDO        1

----- CHANNEL f1 -----
NUC1       1H
P1         9.50 usec
PL1        0 dB
PL1W       8.16363049 W
SFO1       299.8718518 MHz

F2 - Processing parameters
SI         32768
SF         299.8700037 MHz
WDW        EM
SSB        0
LB         0.30 Hz
GB         0
PC         11.00
  
```

sp139-3  
 C13.ucl CDCl3 {C:\Bruker\TOPSPIN} jca 44

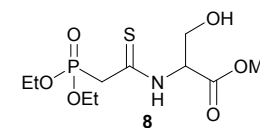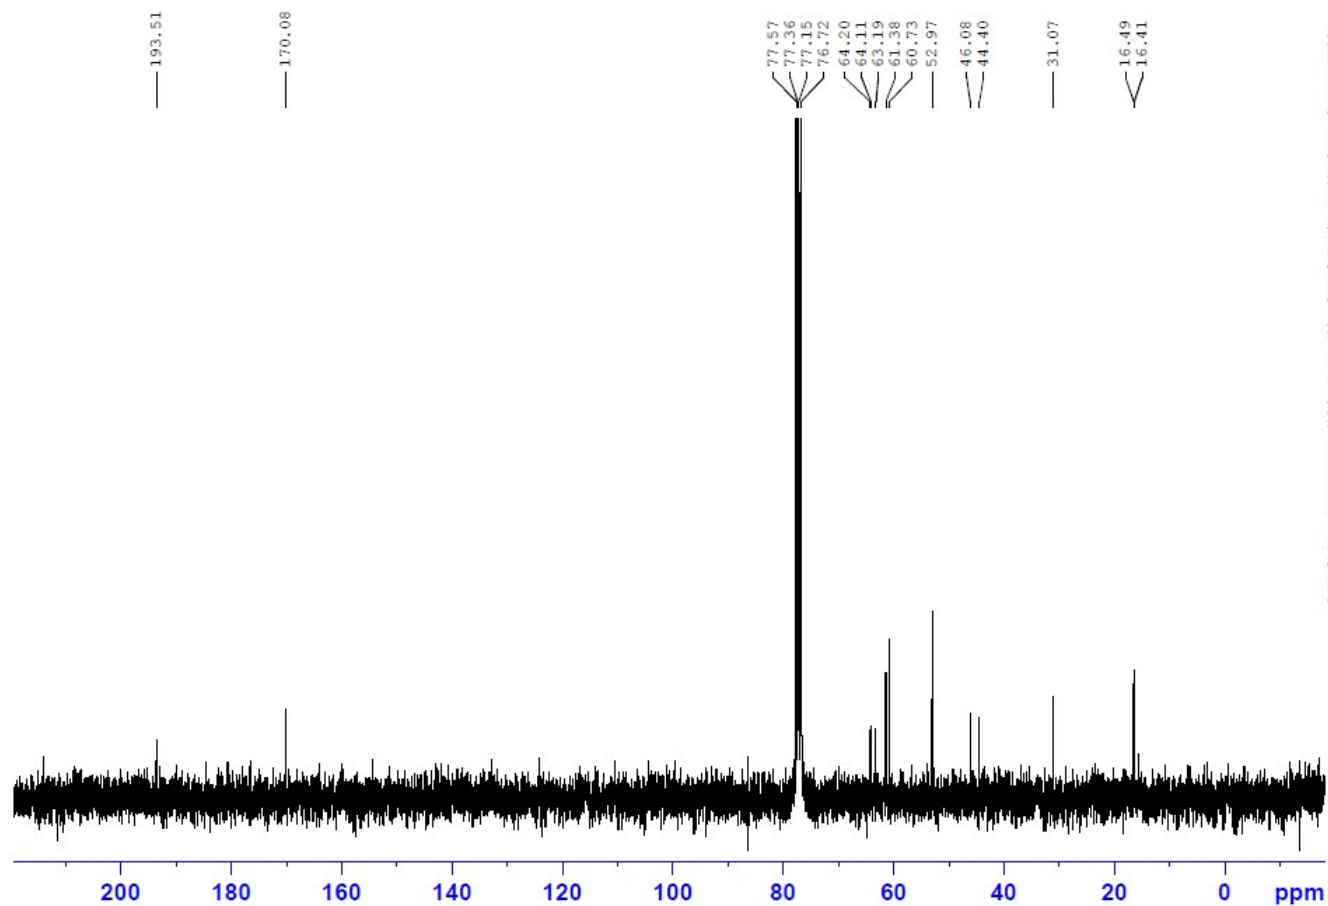

```

Current Data Parameters
NAME      sp139-3-300nm
EXPNO    12
PROCNO   1

F2 - Acquisition Parameters
Date_    20150715
Time     23.07
INSTRUM  spect
PROBHD   5 mm QNP 1H/13
PULPROG  zgpg30
TD       43162
SOLVENT  CDCl3
NS       1024
DS       4
SWH      17985.611 Hz
FIDRES   0.416700 Hz
AQ       1.1999036 sec
RG       46341
DW       27.800 usec
DE       6.50 usec
TE       297.1 K
D1       2.00000000 sec
D11      0.03000000 sec
TDO      1

----- CHANNEL f1 -----
NUC1     13C
P1       8.00 usec
PL1     0 dB
PL1W    24.28994179 W
SFO1    75.4099117 MHz

----- CHANNEL f2 -----
CPDPRG2  waltz16
NUC2     1H
PCPD2   100.00 usec
PL2     0 dB
PL12    20.45 dB
PL13    22.00 dB
PL2W    8.16363049 W
PL1W    0.07360093 W
PL13W   0.05150903 W
SFO2    299.8711995 MHz

F2 - Processing parameters
SI       32768
SF       75.4023611 MHz
WDW     EM
SSB     0
LB      1.00 Hz
GB      0
PC      1.40
  
```

sp139-3  
 P31\_with\_proton\_couplings CDCI3 {C:\Bruker\TOPSPIN} jca 46

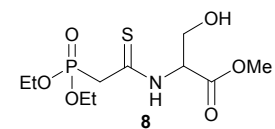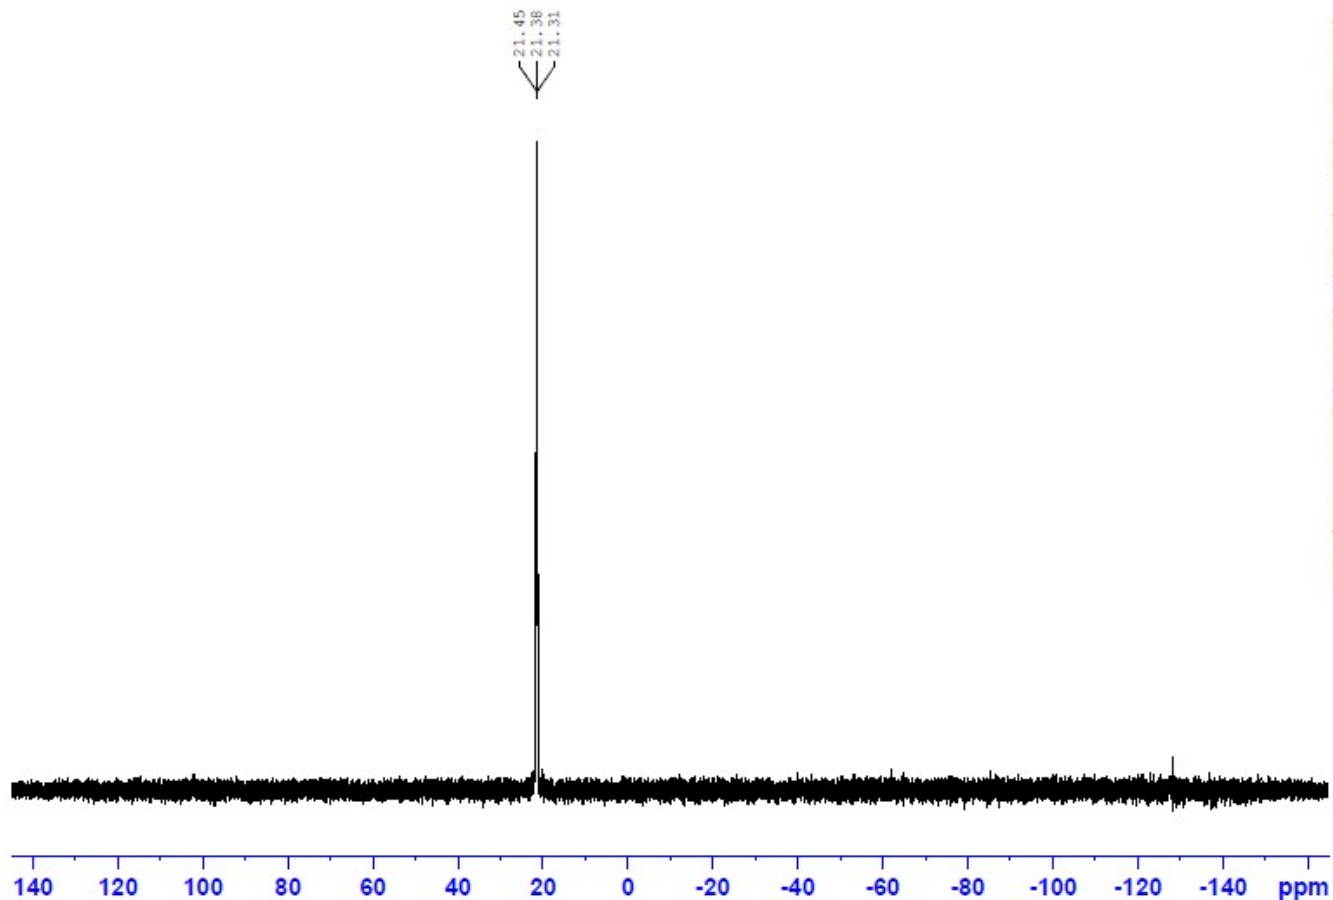

```

Current Data Parameters
NAME      sp139-3-P31coupled
EXPNO    10
PROCNO   1

F2 - Acquisition Parameters
Date_    20150721
Time     11.50
INSTRUM  spect
PROBHD   5 mm QNP 1H/13
PULPROG  zgpg30
TD       65536
SOLVENT  cdcl3
NS       256
DS       4
SWH      37593.984 Hz
FIDRES   0.573639 Hz
AQ       0.8716288 sec
RG       40341
DNF      13.300 usec
DE       6.50 usec
TE       299.6 K
D1       1.1000000 sec
D11      0.0300000 sec
TD0      1

===== CHANNEL f1 =====
NUC1     31P
P1       10.45 usec
PL1      0 dB
PL1W     27.12837410 W
SFO1     121.3883671 MHz

===== CHANNEL f2 =====
CPDPRG2  waltz16
NUC2     13C
PCPD2    100.00 usec
PL2      0 dB
PL2W     18.56 dB
PL2W     8.16363049 W
PL2W     0.13373220 W
SFO2     299.8725939 MHz

F2 - Processing parameters
SI       131072
SF       121.3896010 MHz
WDW      EM
SSB      0
LB       1.00 Hz
GB       0
PC       1.40
  
```

sp147-3  
 PROTON.ucl CDC13 {C:\Bruker\TOPSPIN} jca 35

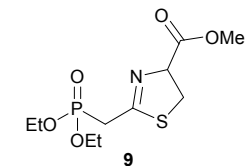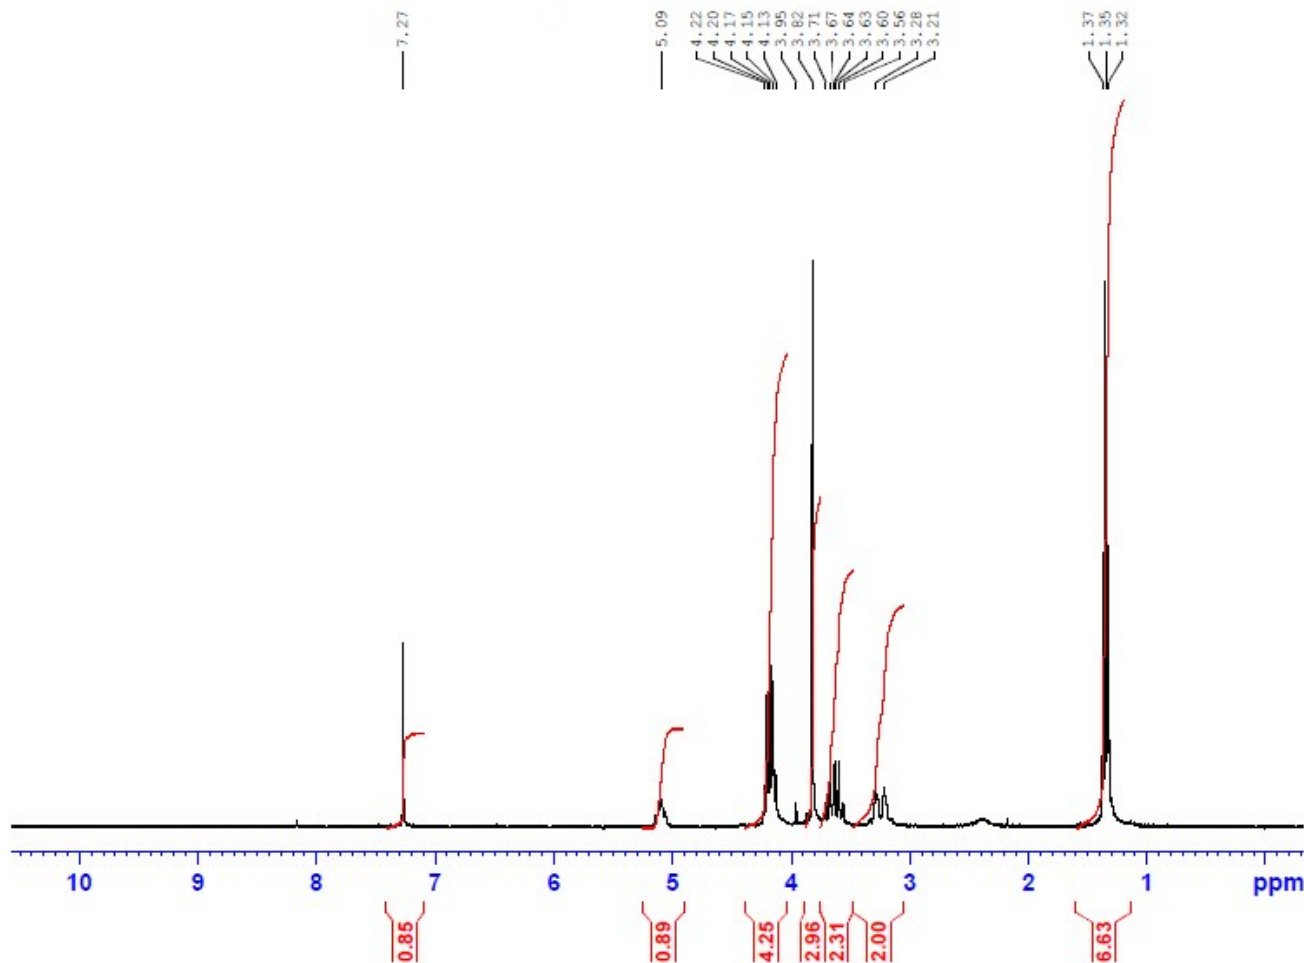

Current Data Parameters  
 NAME sp147-3  
 EXPNO 10  
 PROCNO 1

F2 - Acquisition Parameters  
 Date\_ 20120909  
 Time 15.56  
 INSTRUM spect  
 PROBHD 5 mm QNP 1H/13  
 PULPROG zg30  
 TD 49382  
 SOLVENT CDC13  
 NS 4  
 DS 0  
 SWH 6172.839 Hz  
 FIDRES 0.125002 Hz  
 AQ 3.999421 sec  
 RG 2896.3  
 CW 81.000 usec  
 DE 6.50 usec  
 TE 299.1 K  
 D1 1.0000000 sec  
 TDO 1

===== CHANNEL f1 =====  
 NUC1 1H  
 P1 9.50 usec  
 PL1 0 dB  
 PL1W 8.16363049 W  
 SFO1 299.8718518 MHz

F2 - Processing parameters  
 SI 32768  
 SF 299.8700005 MHz  
 SCW SM  
 SSB 0  
 LB 0.30 Hz  
 GB 0  
 PC 6.00

sp147-3-full data  
 C13\_DayTime.ucl CDCI3 {W:\600} jca 40

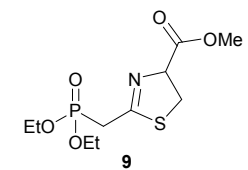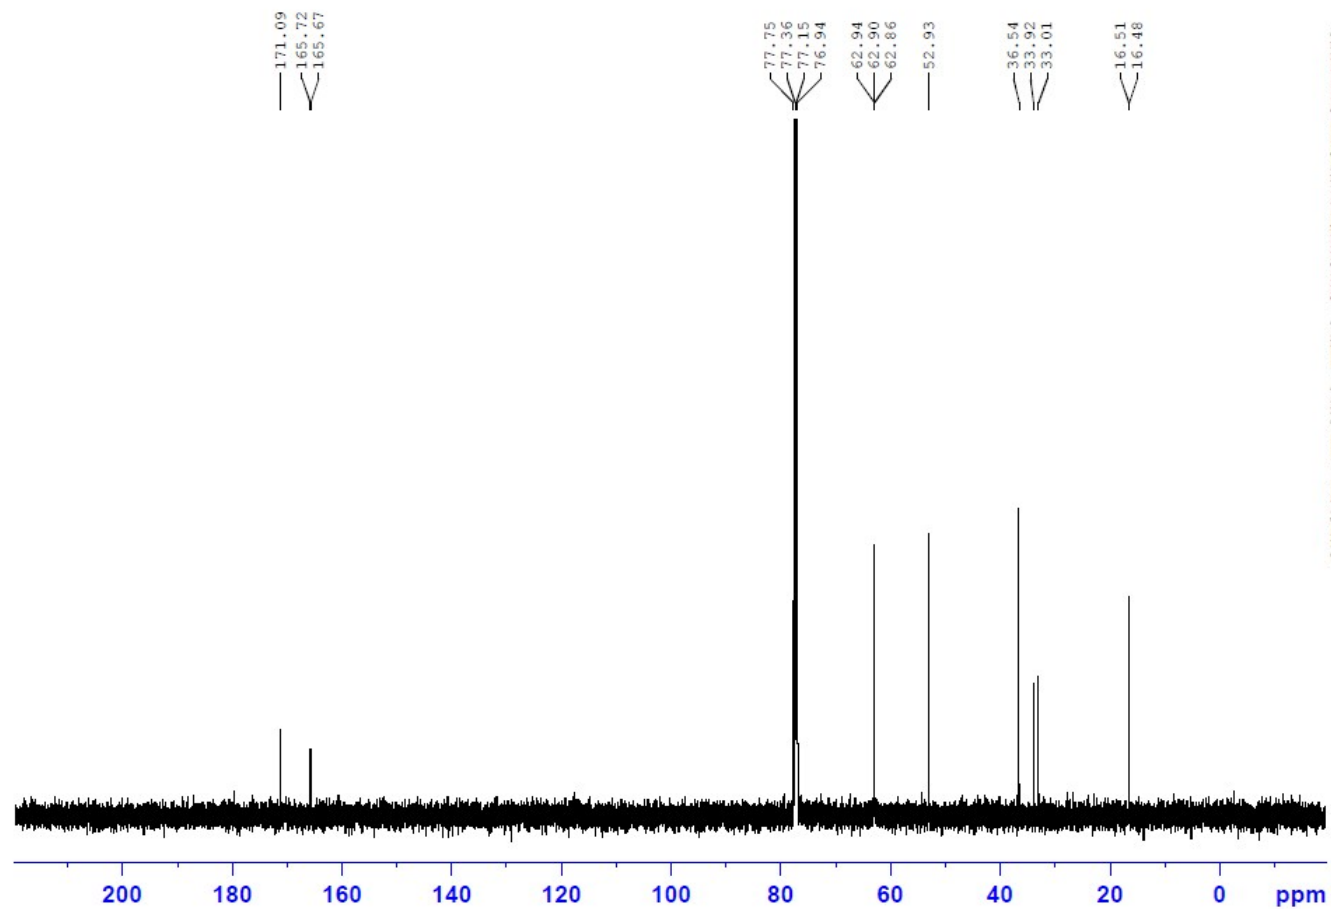

```

Current Data Parameters
NAME      sp147-3-full data
EXPNO     13
PROCNO    1

F2 - Acquisition Parameters
Date_     20160415
Time      11.55
INSTRUM   AV600
PROBHD    5 mm CPDCH 13C
PULPROG   zgpg30
TD         71914
SOLVENT   CDCl3
NS         32
DS         4
SWH        36057.691 Hz
FIDRES     0.501400 Hz
AQ         0.9972075 sec
RG         203
DW         13.867 usec
DE         19.08 usec
TE         298.0 K
D1         1.79999995 sec
D11        0.03000000 sec
TDO        2

----- CHANNEL f1 -----
SFO1      150.9178981 MHz
NUC1      13C
P1         9.80 usec
PLW1      26.76899910 W

----- CHANNEL f2 -----
SFO2      600.1324005 MHz
NUC2      1H
CPDPRG2   waltz16
PCPD2     70.00 usec
PLW2      13.76700020 W
PLW12     0.8513001 W
PLW13     0.17892000 W

F2 - Processing parameters
SI         65536
SF         150.9027930 MHz
WDW        EM
SSB        0
LB         1.00 Hz
GB         0
PC         1.40
  
```



sp147-3P31  
P31.ucl CDCl3 {C:\Bruker\TOPSPIN} jca 35

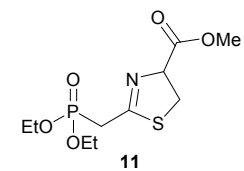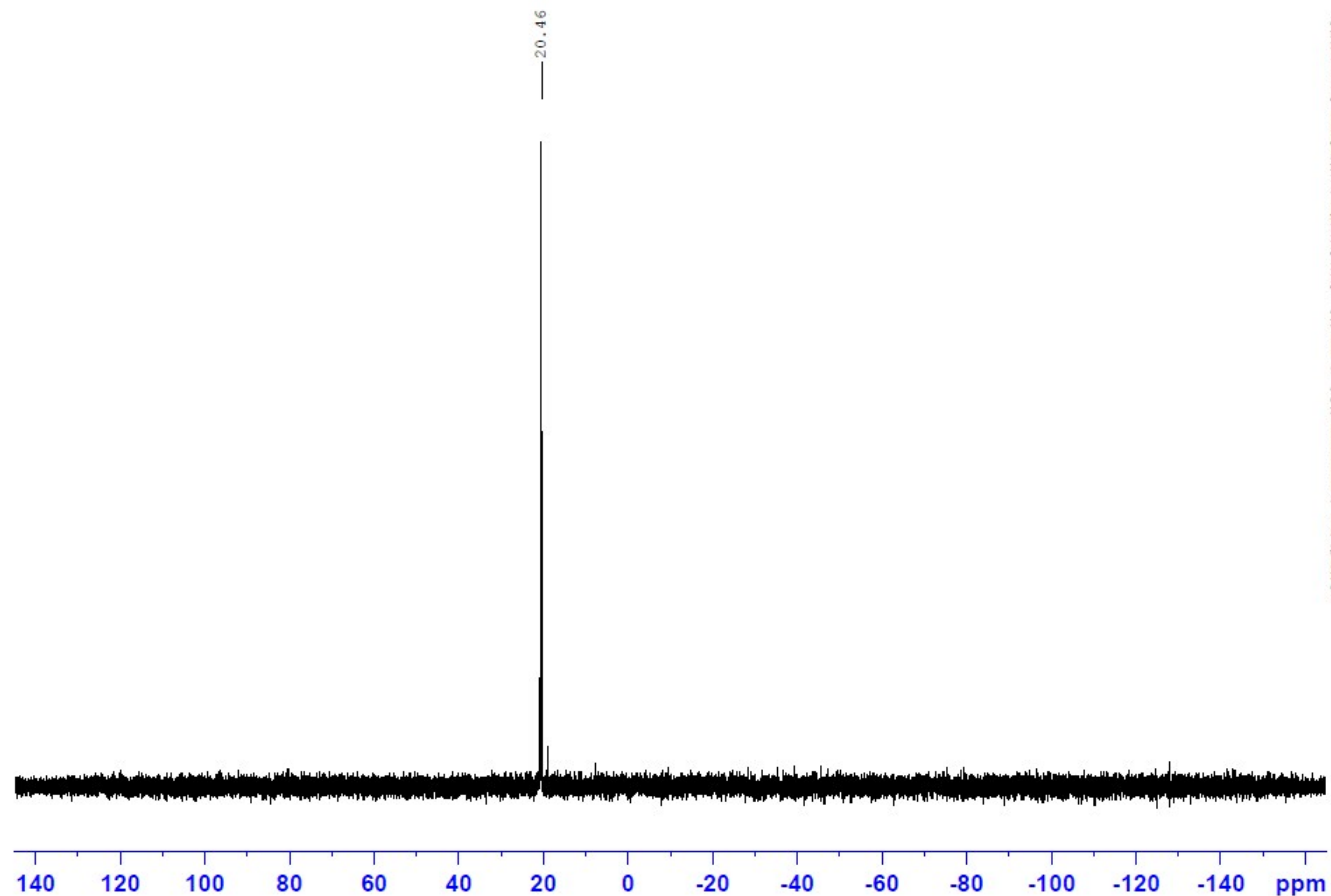

```
Current Data Parameters
NAME      sp147-3P31
EXPNO     10
PROCNO    1

F2 - Acquisition Parameters
Date_     20150909
Time      16.05
INSTRUM   spect
PROBHD    5 mm QNP 1H/13
PULPROG   zgpg30
TD        58818
SOLVENT   CDCl3
NS        64
DS        4
SWH       37593.984 Hz
FIDRES    0.639158 Hz
AQ        0.7822794 sec
RG        46341
DW        13.300 usec
DE        6.50 usec
TE        298.4 K
D1        1.29999995 sec
D11       0.03000000 sec
TDO       1

----- CHANNEL f1 -----
NUC1      31P
P1        10.45 usec
PL1       0 dB
PL1W      27.12837410 W
SFO1      121.3883871 MHz

----- CHANNEL f2 -----
CPDPRG12  waltz16
NUC2      1H
PCPD2     100.00 usec
PL2       0 dB
PL12      18.56 dB
PL13      22.00 dB
PL2W      8.16363049 W
PL1W      0.11373220 W
PL13W     0.05150903 W
SFO2      299.8711995 MHz

F2 - Processing parameters
SI        131072
SF        121.3896010 MHz
WDW       EM
SSB       0
LB        1.00 Hz
GB        0
PC        1.40
```

hg850-2  
 PROTON.ucl CDC13 {W:\600} jca 10

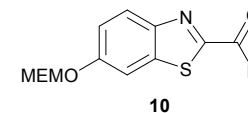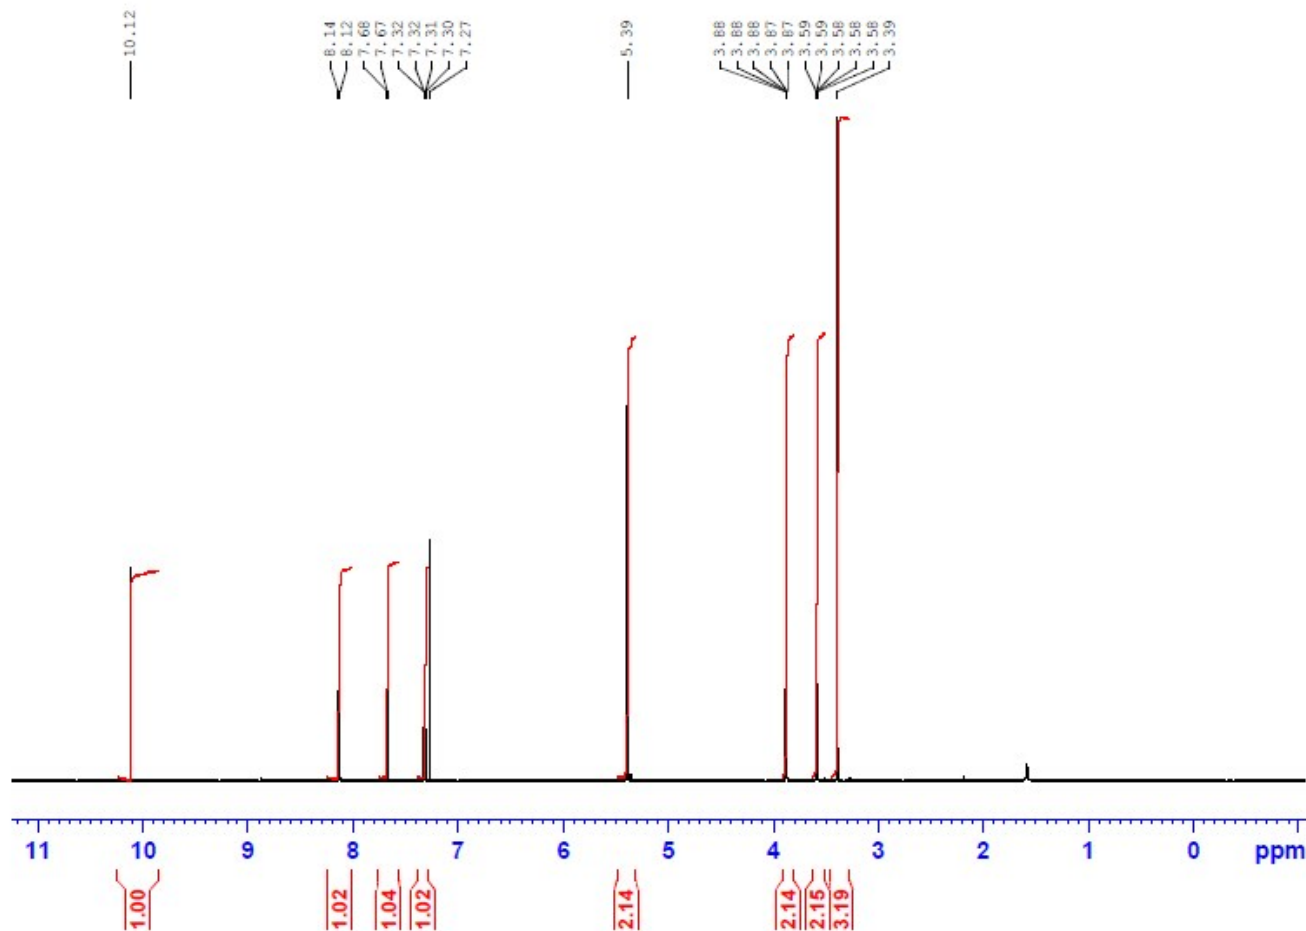

```

Current Data Parameters
NAME      hg850-2
EXPNO    10
PROCNO    1

F2 - Acquisition Parameters
Date_     2011013
Time      10.44
INSTRUM   AV600
PROBHD    5 mm CPDCH 13C
PULPROG   zg30
TD         98682
SOLVENT   CDCl3
NS         4
DS         0
SWH        12335.526 Hz
FIDRES     0.125003 Hz
AQ         3.999104 sec
RG         40.3
DW         40.533 usec
DE         11.40 usec
TE         298.0 K
D1         1.00000000 sec
TD0        1

===== CHANNEL f1 =====
SFO1      600.137061 MHz
NUC1      1H
P1         11.40 usec
PLW1      13.76731014 W

F2 - Processing parameters
SI         131072
SF         600.130088 MHz
WDW        no
SSB        0
LB         0 Hz
GB         0
PC         1.40
  
```

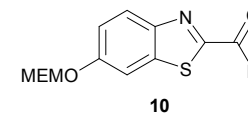

C13CPD.ucl CDCI3 {W:\600} tds 10

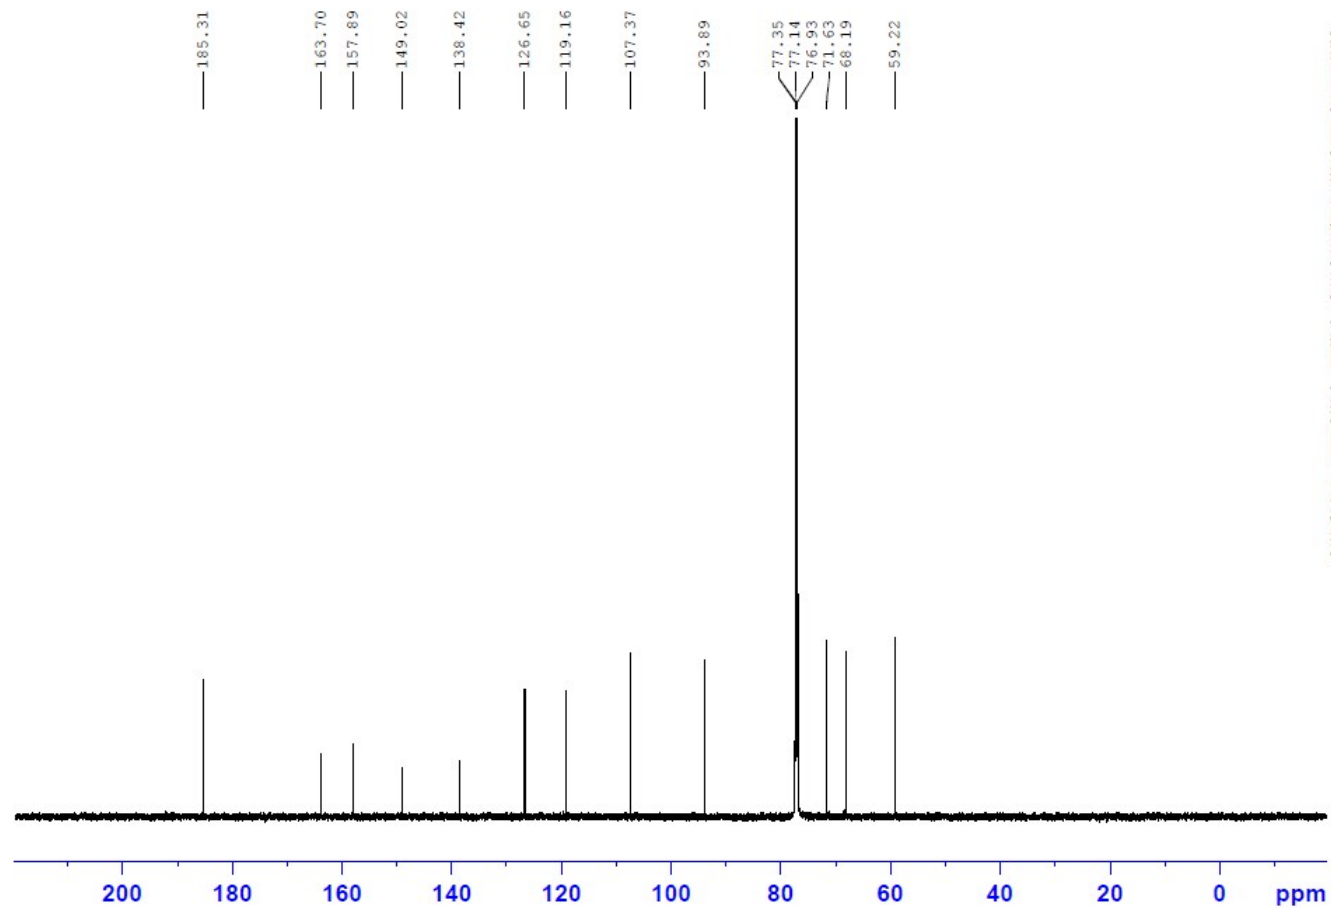

```

Current Data Parameters
NAME          hg850-2
EXPNO        12
PROCNO       1

F2 - Acquisition Parameters
Date_        20151013
Time         12.01
INSTRUM      AVS00
PROBHD       5 mm CPDCH 13C
PULPROG      zgpg30
TD           65340
SOLVENT      CDCl3
NS           128
DS           0
SWH          36057.691 Hz
FIDRES       0.551847 Hz
AQ           0.9060480 sec
RG           1030
DW           13.867 usec
DE           20.82 usec
TE           298.0 K
D1           2.0000000 sec
D11          0.03000000 sec
TDO          1

----- CHANNEL f1 -----
SFO1         150.9178981 MHz
NUC1         13C
P1           9.80 usec
PLW1         26.76885986 W

----- CHANNEL f2 -----
SFO2         600.1324005 MHz
NUC2         1H
CPDPRG12    waltz16
PCPD2       70.00 usec
PLW2        13.76731014 W
PLW12       0.32798141 W
PLW13       0.17332020 W

F2 - Processing parameters
SI           32768
SF           150.9027930 MHz
WDW          EM
SSB          0
LB           1.00 Hz
GB           0
PC           1.40
  
```

sp164-2  
 PROTON.ucl CDC13 {W:\600} jca 8

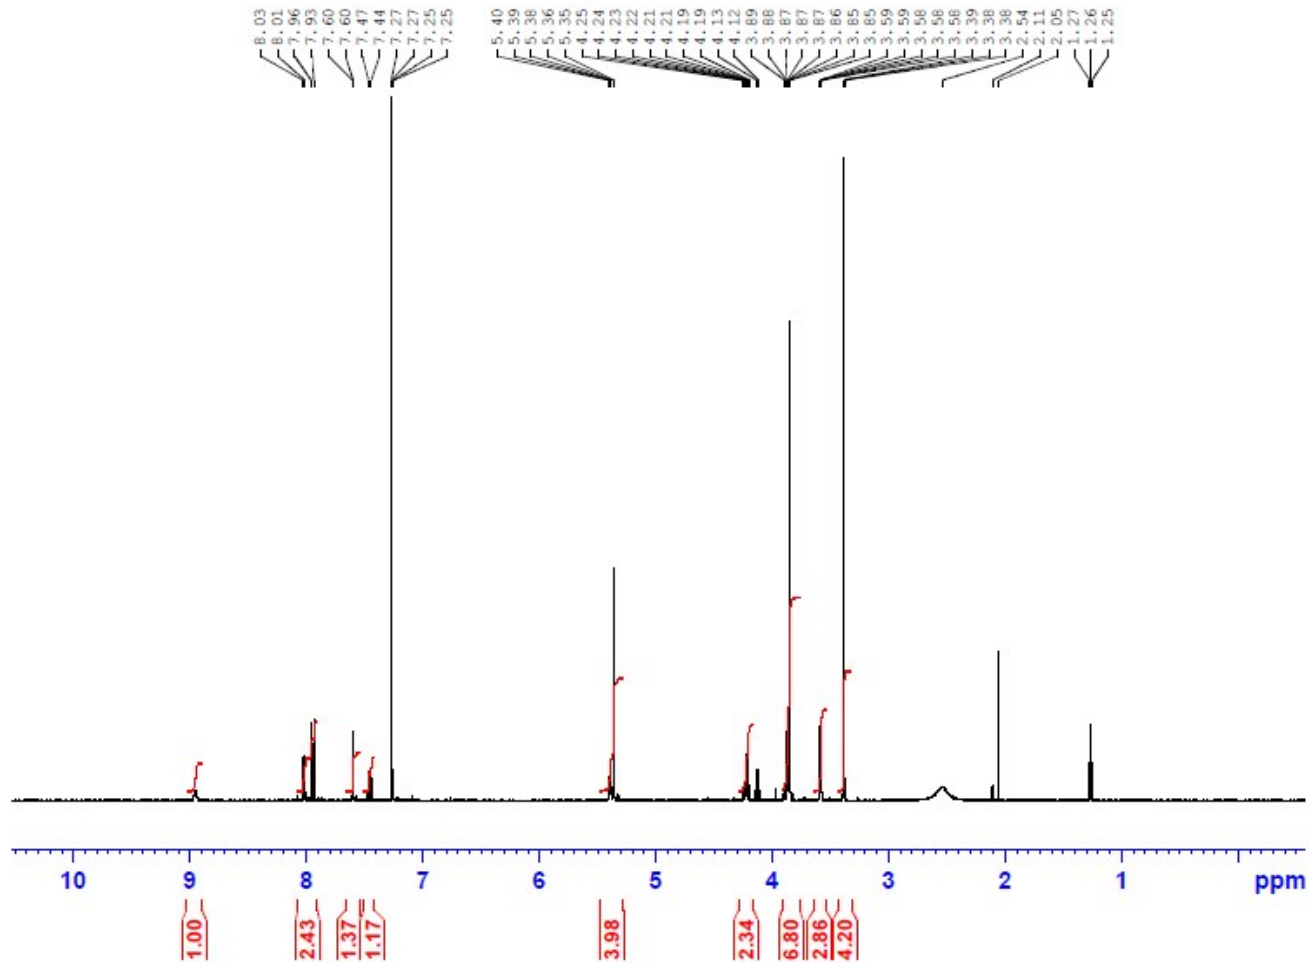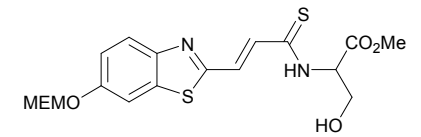

11

Current Data Parameters  
 NAME sp164-2  
 EXPNO 10  
 PROCNO 1

F2 - Acquisition Parameters  
 Date\_ 2011104  
 Time 12.31  
 INSTRUM AV600  
 PROBNM 5 mm CPDCH 13C  
 PULPROG zg30  
 TD 98682  
 SOLVENT CDC13  
 NS 4  
 DS 0  
 SWH 12335.526 Hz  
 FIDRES 0.125003 Hz  
 AQ 3.999104 sec  
 RG 40.3  
 DW 40.533 usec  
 DE 11.40 usec  
 TE 298.0 K  
 D1 1.0000000 sec  
 TDO 1

===== CHANNEL f1 =====  
 SFO1 600.137061 MHz  
 NUC1 1H  
 P1 11.40 usec  
 PLW1 13.76731014 W

F2 - Processing parameters  
 SI 131072  
 SF 600.1300116 MHz  
 SWH 0  
 DS 0  
 IS 0 Hz  
 OS 0  
 PC 1.40

sp164-2  
 C13\_DayTime.ucl CDCI3 {W:\600} jca 8

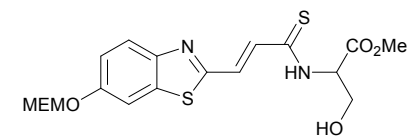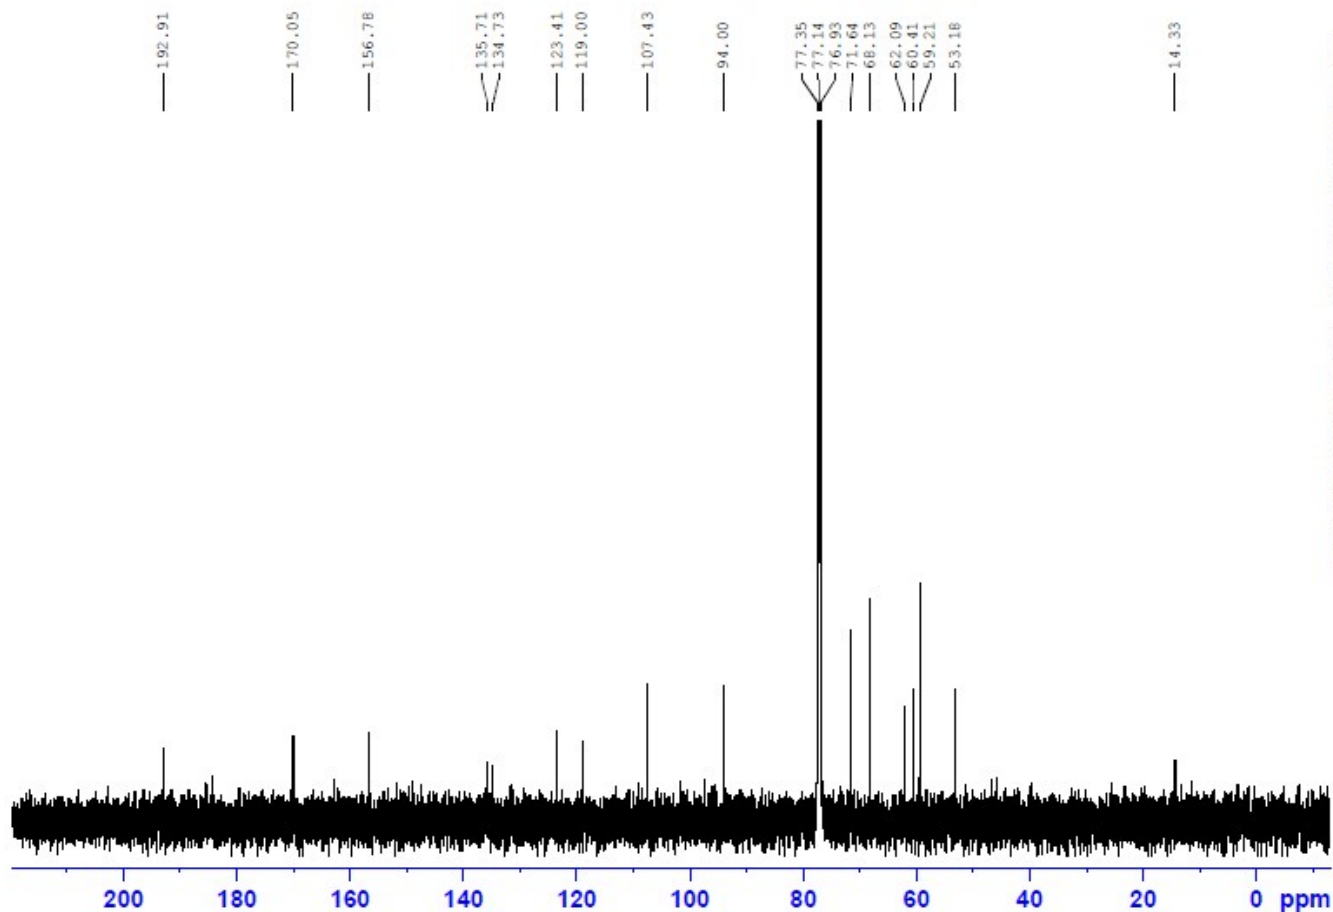

```

Current Data Parameters
NAME      sp164-2
EXPNO    11
PROCNO   1

F2 - Acquisition Parameters
Date_    20151104
Time     12.34
INSTRUM  AV600
PROBHD   5 mm CPDCH 13C
PULPROG  zgpg30
TD        65540
SOLVENT  cdcl3
NS        32
DS        0
SWH       36257.691 Hz
FIDRES    0.351847 Hz
AQ        0.9060480 sec
RG         1030
DN        13.567 usec
DE        20.82 usec
TE        298.0 K
D1        2.0000000 sec
D11       0.0300000 sec
TDO       1

===== CHANNEL f1 =====
SFO1     150.9178961 MHz
NUC1      13C
P1        9.80 usec
PLM1     26.76885986 W

===== CHANNEL f2 =====
SFO2     600.1324005 MHz
NUC2      1H
CPDPRG2  waltz16
PCPD2     70.00 usec
PLM2     13.76731014 W
PLM3     0.32798141 W
PLM13    0.17332020 W

F2 - Processing parameters
SI        32768
SF        150.9027930 MHz
WDW       EM
SSB       0
LB        1.00 Hz
GB        0
PC        1.40
  
```

sp195-frac8  
 PROTON.ucl CDC13 {W:\600} hch3 6

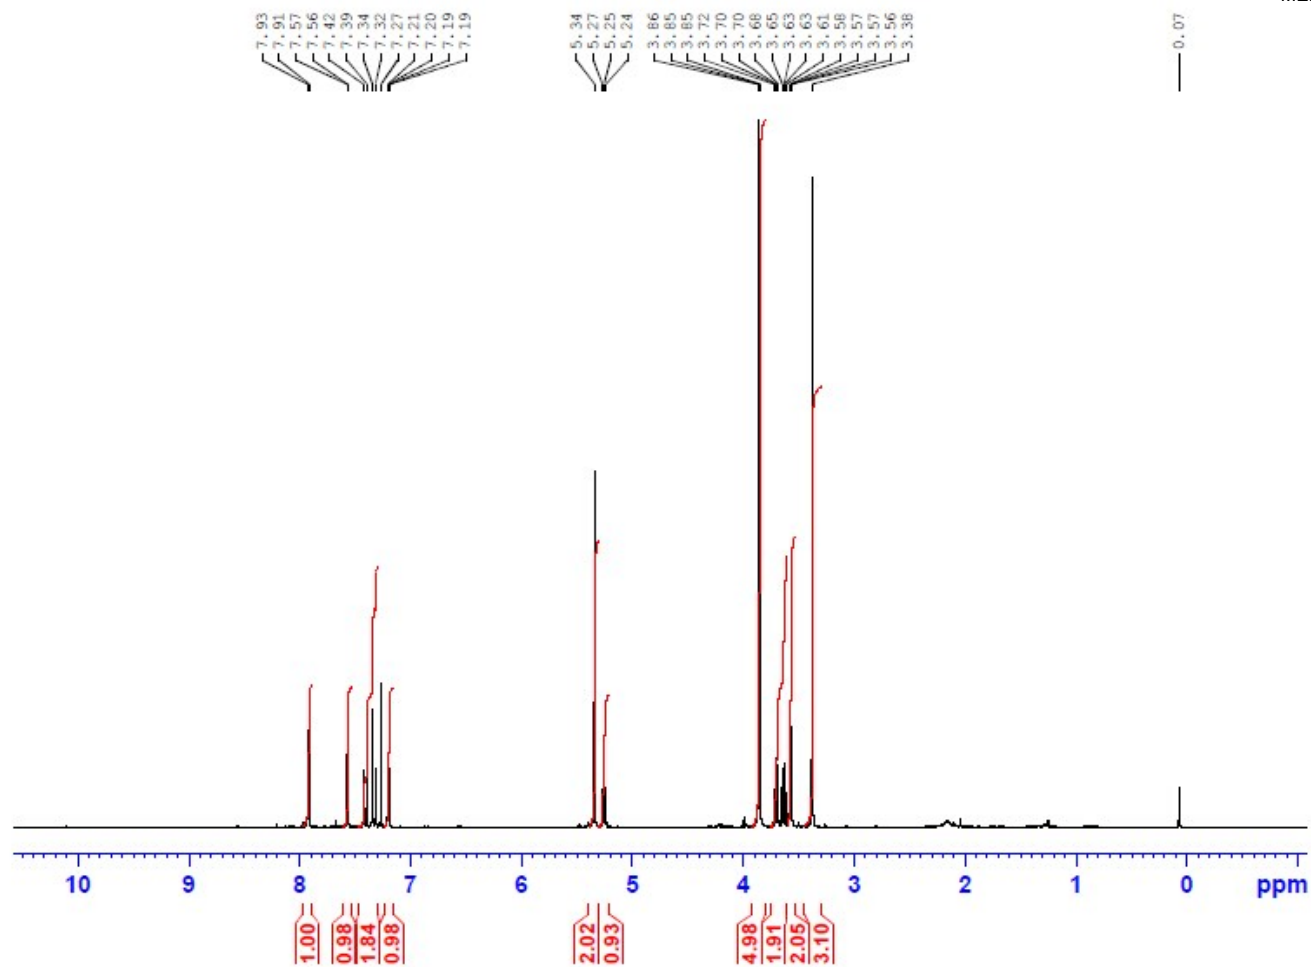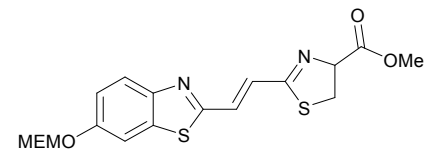

12

Current Data Parameters  
 NAME sp195-frac8  
 EXPNO 10  
 PROCNO 1

F2 - Acquisition Parameters  
 Date\_ 20160122  
 Time 14.57  
 INSTRUM AV600  
 PROBNM 5 mm CPDCH 13C  
 PULPROG zg30  
 TD 98682  
 SOLVENT CDCl3  
 NS 4  
 DS 0  
 SWH 12335.526 Hz  
 FIDRES 0.125003 Hz  
 AQ 3.9992104 sec  
 RG 40.3  
 DW 40.533 usec  
 DE 11.40 usec  
 TE 298.0 K  
 D1 1.00000000 sec  
 TDO 1

===== CHANNEL f1 =====  
 SFO1 600.1337061 MHz  
 NUC1 1H  
 P1 11.40 usec  
 PLW1 13.76731014 W

F2 - Processing parameters  
 SI 131072  
 SF 600.1300116 MHz  
 MEW no  
 SSB 0  
 LB 0 Hz  
 GB 0  
 PC 1.40

sp195-frac8  
 C13\_DayTime.ucl CDCI3 {W:\600} hch3 6

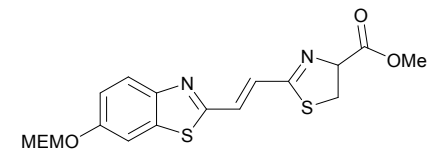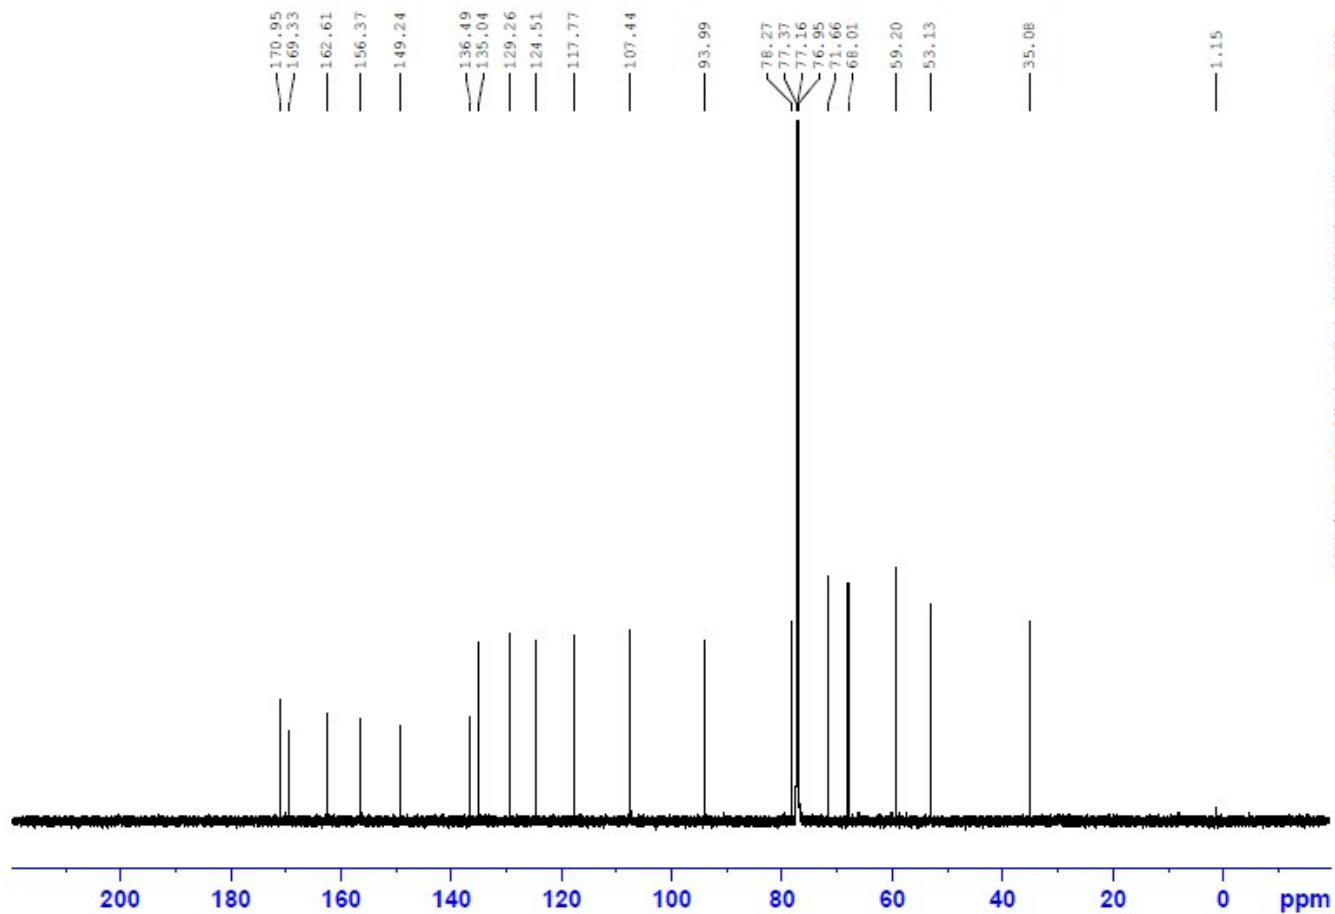

```

Current Data Parameters
NAME      sp195-frac8
EXPNO     11
PROCNO    1

F2 - Acquisition Parameters
Date_     20160122
Time      15.00
INSTRUM   AV600
PROBHD    5 mm CPOCH 13C
PULPROG   zgpg30
TD         71914
SOLVENT   CDCl3
NS         32
DS         4
SWH        36257.691 Hz
FIDRES     0.501400 Hz
AQ         0.9972075 sec
RG         203
DNW        13.867 usec
DE         19.08 usec
TE         298.0 K
D1         1.7899995 sec
D11        0.0300000 sec
TDO        2

===== CHANNEL f1 =====
SFO1      150.9178961 MHz
NUC1       13C
P1         9.80 usec
PLM1       26.76899910 W

===== CHANNEL f2 =====
SFO2      600.1324005 MHz
NUC2       1H
CPOPRG[2] waltz16
PCPD2      70.00 usec
PLM2       13.76700020 W
PLM12      0.36513001 W
PLM13      0.17892000 W

F2 - Processing parameters
SI         65536
SF         150.9027930 MHz
WDW        EM
SSB        0
LB         1.00 Hz
GB         0
PC         1.40
  
```

sp196-1  
 PROTON.ucl MeOD {W:\600} jca 38

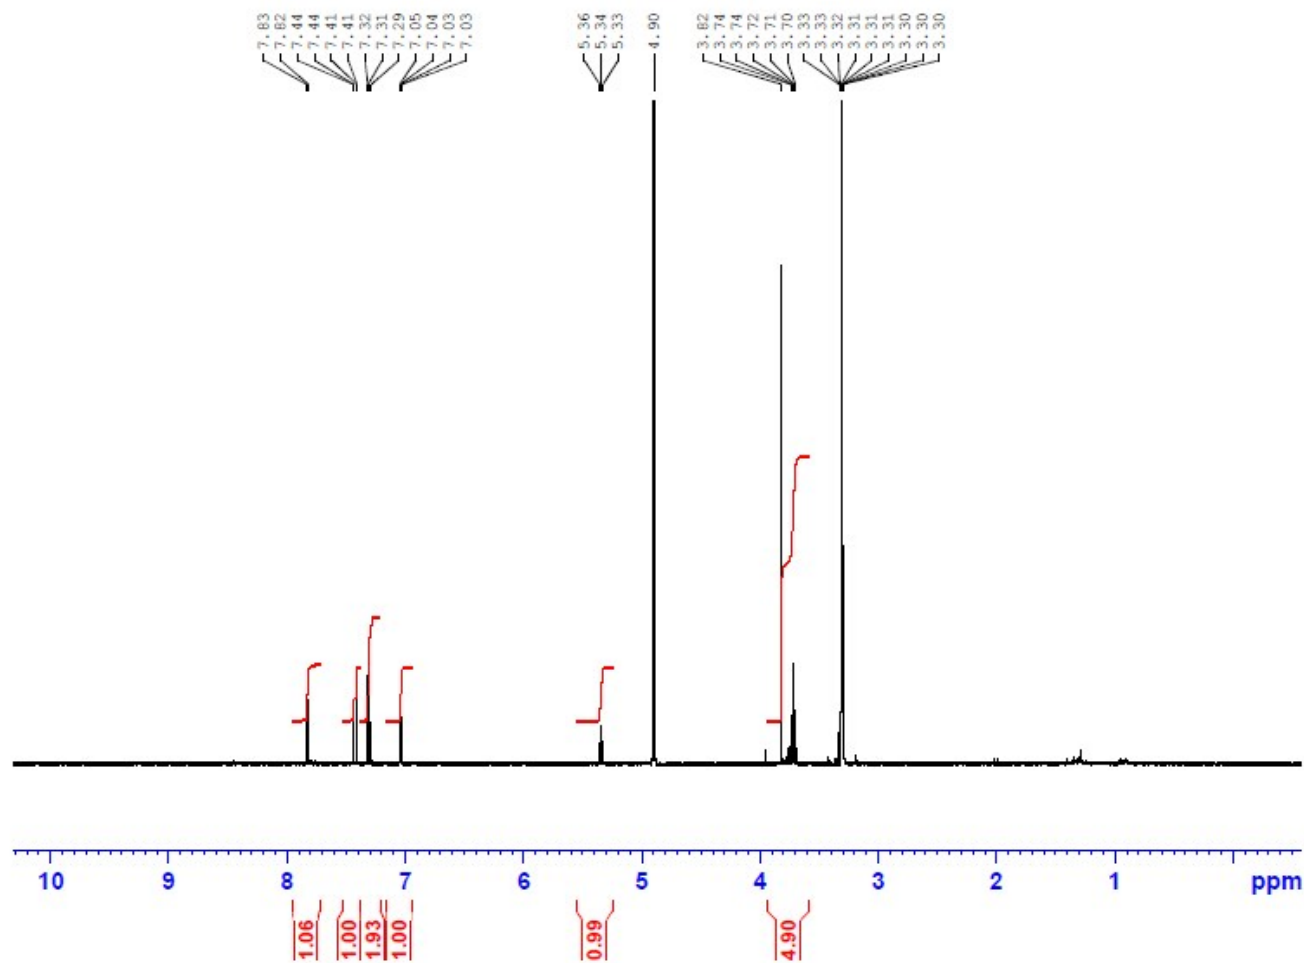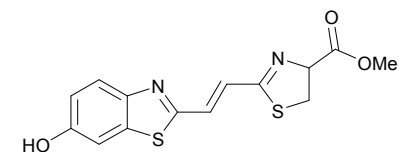

6

```

Current Data Parameters
NAME      sp196-1
EXPNO    10
PROCNO   1

F2 - Acquisition Parameters
Date_    20160126
Time     13.28
INSTRUM  AV600
PROBHD   5 mm CPDOR 13C
PULPROG  zg30
TD        66882
SOLVENT  MeOD
NS        4
DS        0
SWH       12335.526 Hz
FIDRES    0.123003 Hz
AQ        3.9999104 sec
RG        40.3
RW        40.533 usec
TE        11.40 usec
TE        298.0 K
D1        1.00000000 sec
TD0       1

===== CHANNEL f1 =====
SFO1     600.137061 MHz
NUC1     1H
P1       11.40 usec
P1M1     13.76731014 W

F2 - Processing parameters
SI       131072
SF       600.1300141 MHz
MW       no
SI0      0
LB       0 Hz
GB       0
PC       1.40
  
```



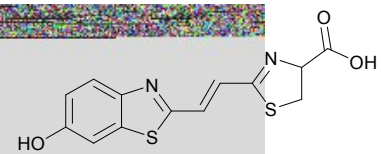

4

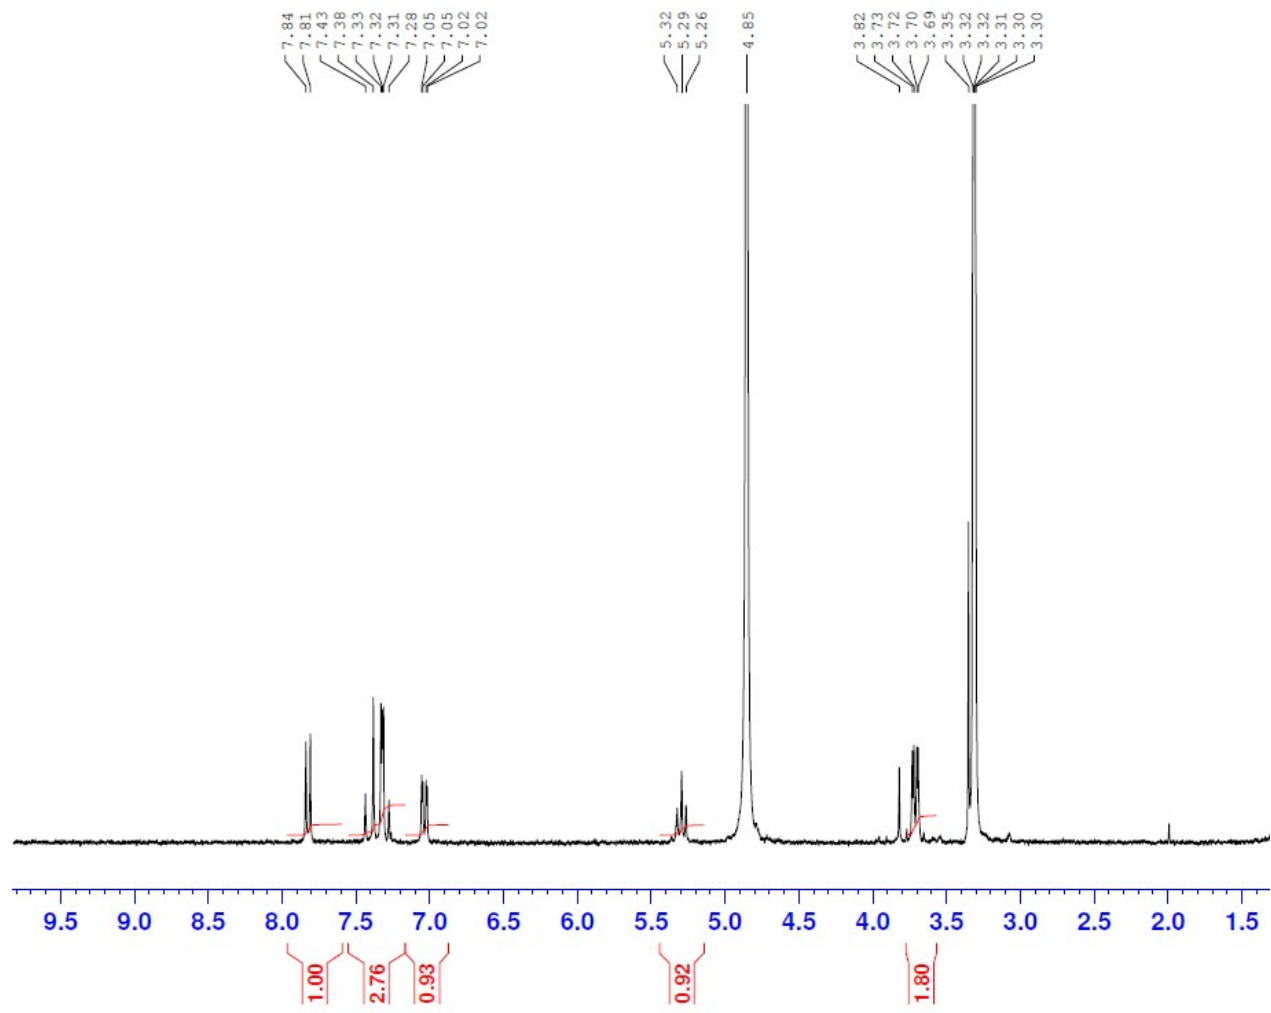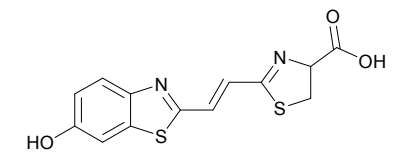

4

sp215  
 C13\_DayTime.ucl MeOD {W:\600} jca 26

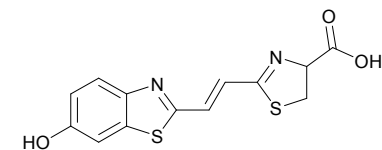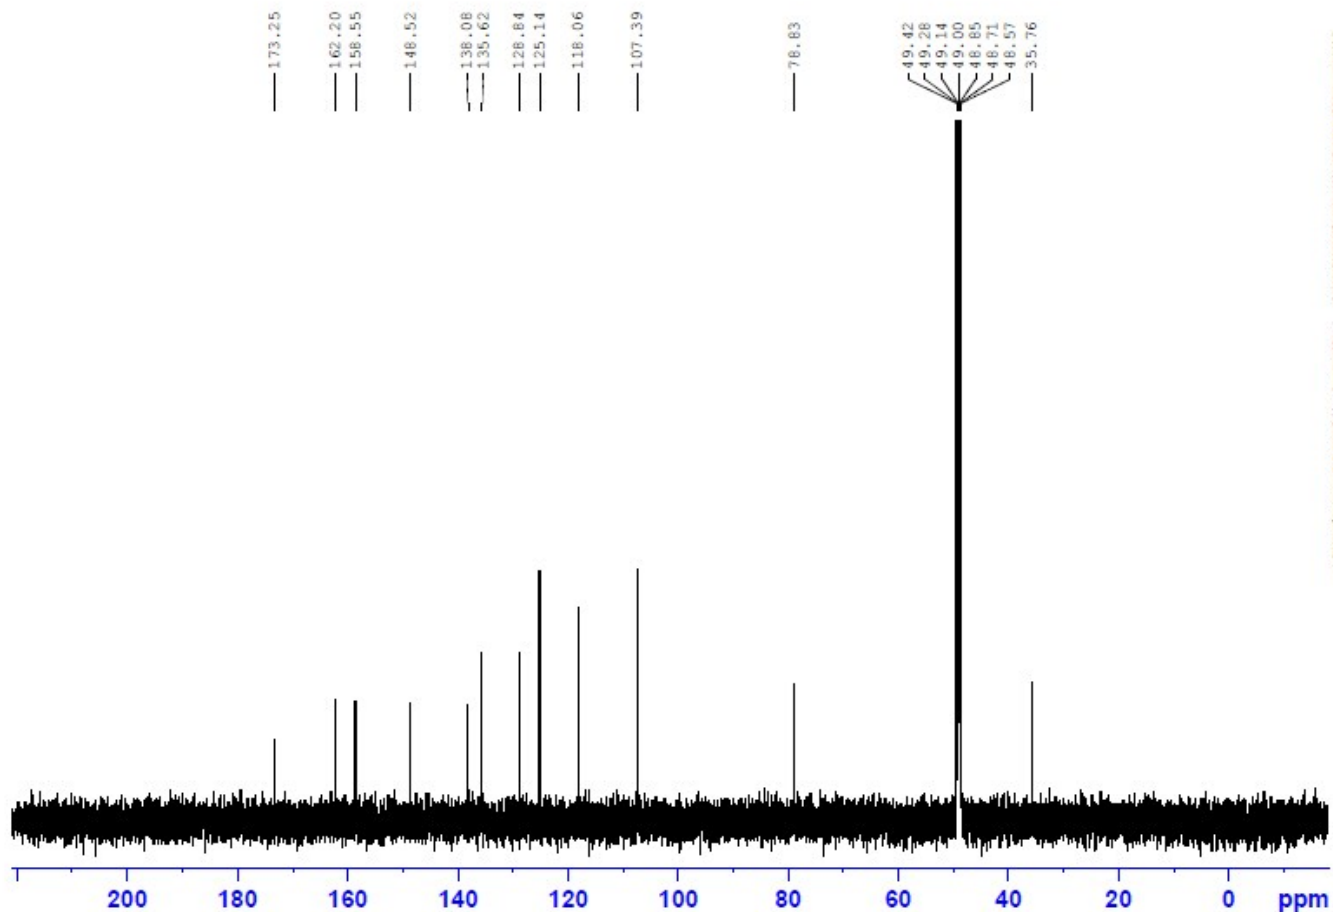

```
Current Data Parameters
NAME      sp215-full data
EXPNO    12
PROCNO   1

F2 - Acquisition Parameters
Date_    20160420
Time     14.48
INSTRUM  AV600
PROBHD   5 mm CPDCH 13C
PULPROG  zgpg30
TD        71914
SOLVENT  MeOD
NS        32
DS        4
SWH       36257.691 Hz
FIDRES    0.501400 Hz
AQ        0.9972075 sec
RG        203
DNF       13.867 usec
DE        19.08 usec
TE        298.0 K
D1        1.79999995 sec
D11       0.03000000 sec
TDO       2
```

4

```
===== CHANNEL #1 =====
SFO1    150.9178961 MHz
NUC1     13C
P1       9.80 usec
P1M1    26.76899910 W
```

```
===== CHANNEL #2 =====
SFO2    600.1324005 MHz
NUC2     1H
CPCPRG2  waltz16
PCPD2    70.00 usec
P2M2    13.76700020 W
P2M12   0.36813051 W
P2M13   0.17892000 W
```

```
F2 - Processing parameters
SI       65536
SF       150.9025980 MHz
WDW      EM
SSB      0
LB       1.00 Hz
GB       0
PC       1.40
```

hg855c01  
 PROTON.ucl CDC13 {W:\600} jca 14

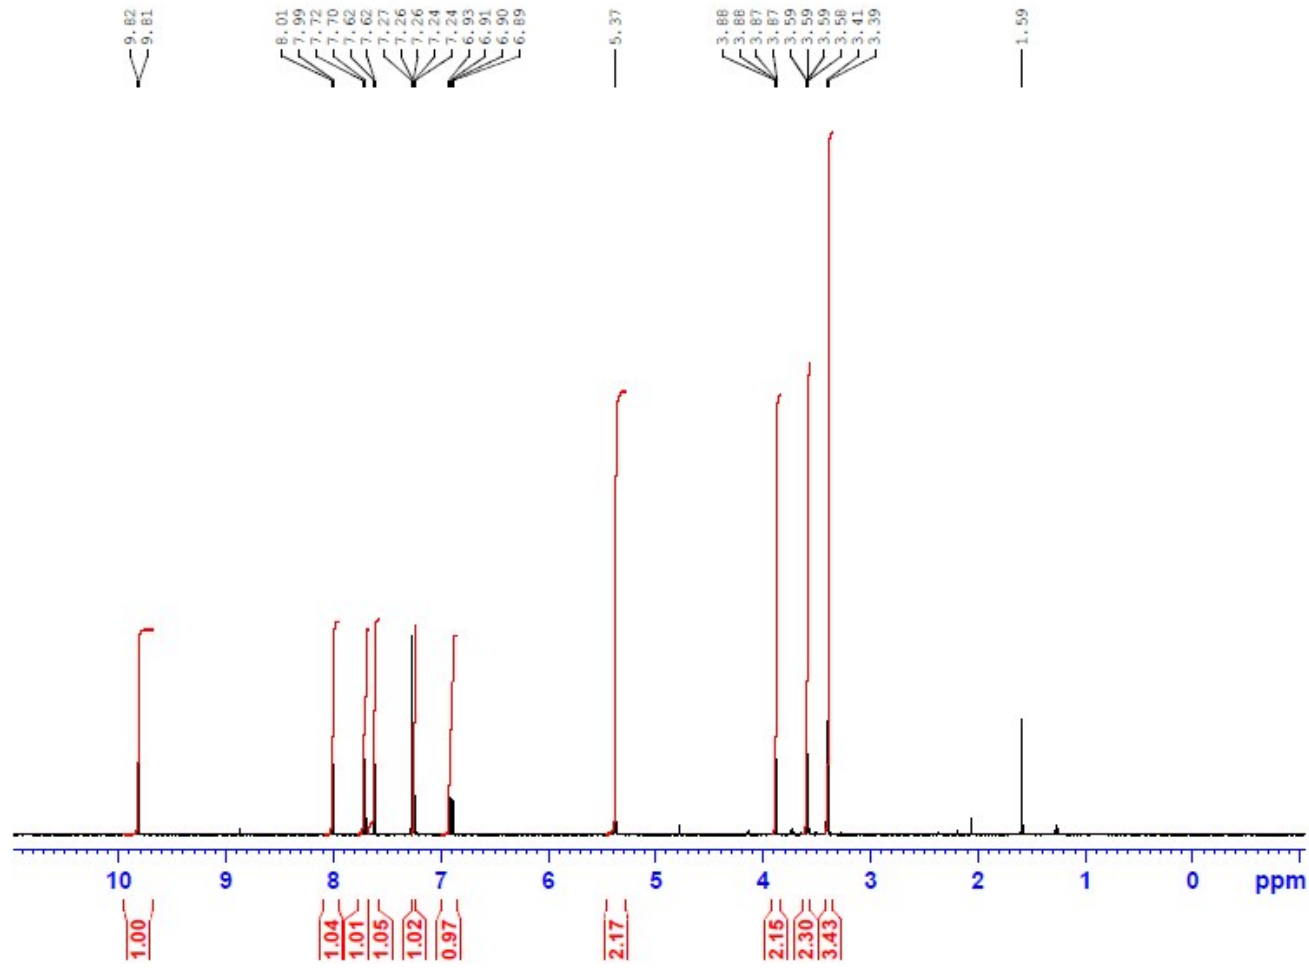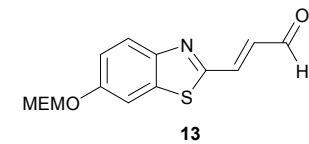

Current Data Parameters  
 NAME hg855c01  
 EXNO 10  
 PROCNO 1

F2 - Acquisition Parameters  
 Date\_ 2011035  
 Time 12.46  
 INSTRUM AV600  
 PROBHD 5 mm CPDCH 13C  
 PULPROG zg30  
 TD 50482  
 SOLVENT CDC13  
 NS 4  
 DS 0  
 SWH 12335.526 Hz  
 FIDRES 0.125003 Hz  
 AQ 3.9999104 sec  
 RG 40.3  
 CW 40.533 usec  
 DE 11.46 usec  
 TE 298.0 K  
 D1 1.00000000 sec  
 TDO 1

===== CHANNEL f1 =====  
 SF01 600.1337061 MHz  
 NUC1 1H  
 P1 11.40 usec  
 PLW1 13.76731014 W

F2 - Processing parameters  
 SI 32768  
 SF 600.1300075 MHz  
 WEW no  
 SSB 0  
 LB 0 Hz  
 GB 0  
 PC 1.40

hg855col  
 C13CPD.ucl CDCI3 {W:1600} jca 14

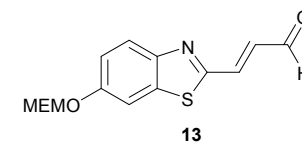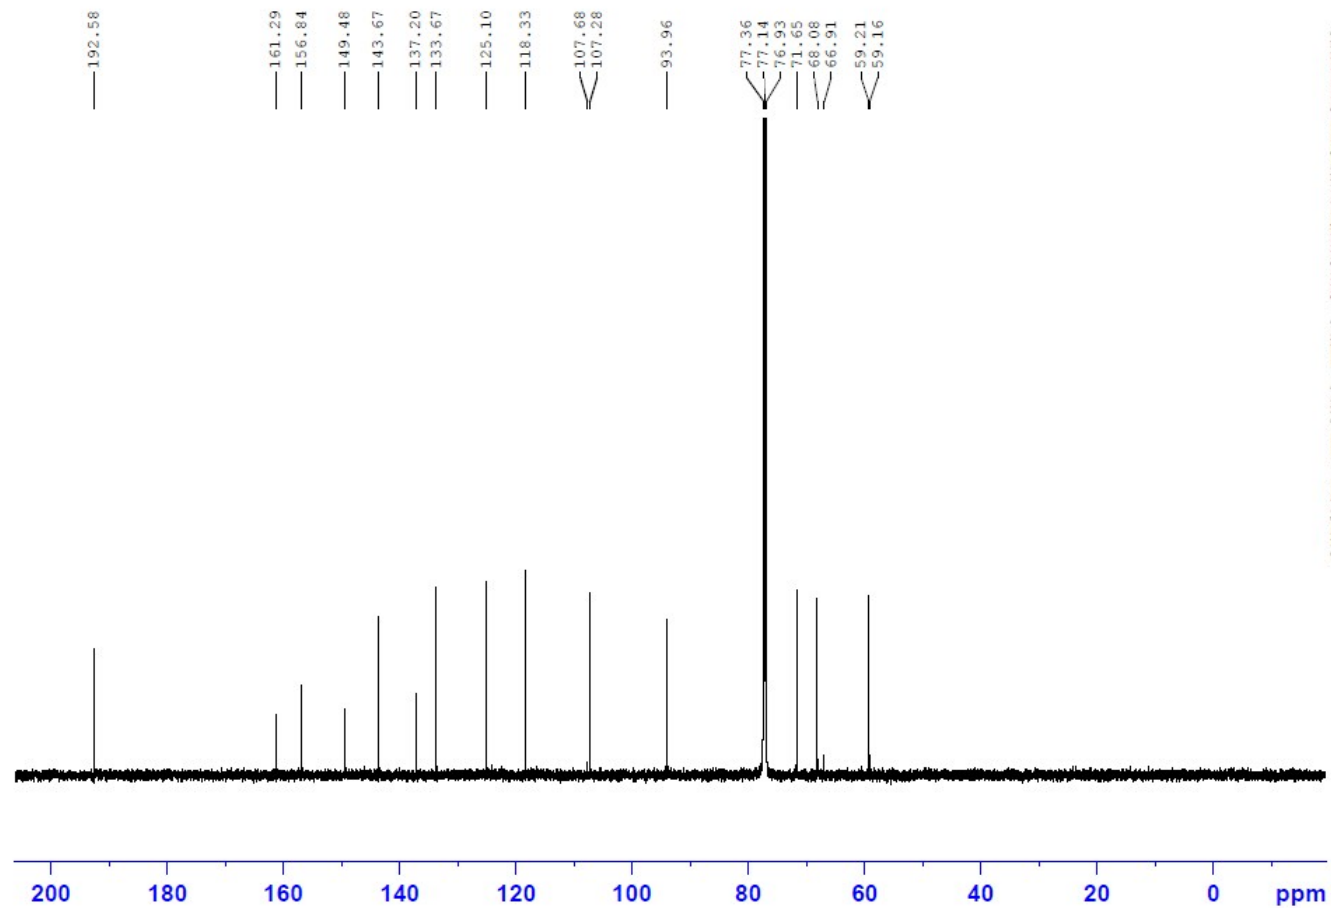

```

Current Data Parameters
NAME      hg855col
EXPNO    12
PROCNO   1

F2 - Acquisition Parameters
Date_    20151005
Time     13.01
INSTRUM  AVS00
PROBHD   5 mm CPDCH 13C
PULPROG  zgpg30
TD       65340
SOLVENT  CDCl3
NS       128
DS       0
SWH      36057.691 Hz
FIDRES   0.551847 Hz
AQ       0.9060480 sec
RG       1030
DW       13.867 usec
DE       20.82 usec
TE       298.0 K
D1       2.0000000 sec
D11      0.0300000 sec
TDO      1

----- CHANNEL f1 -----
SFO1    150.9178981 MHz
NUC1    13C
P1      9.80 usec
PLW1    26.76885986 W

----- CHANNEL f2 -----
SFO2    600.1324005 MHz
NUC2    1H
CPDPRG2 waltz16
PCPD2   70.00 usec
PLW2    13.76731014 W
PLW12   0.32798141 W
PLW13   0.17332020 W

F2 - Processing parameters
SI      32768
SF      150.9027930 MHz
WDW     EM
SSB     0
LB      1.00 Hz
GB      0
PC      1.40
  
```

hg894col  
 PROTON.ucl CDC13 {W:\600} jca 53

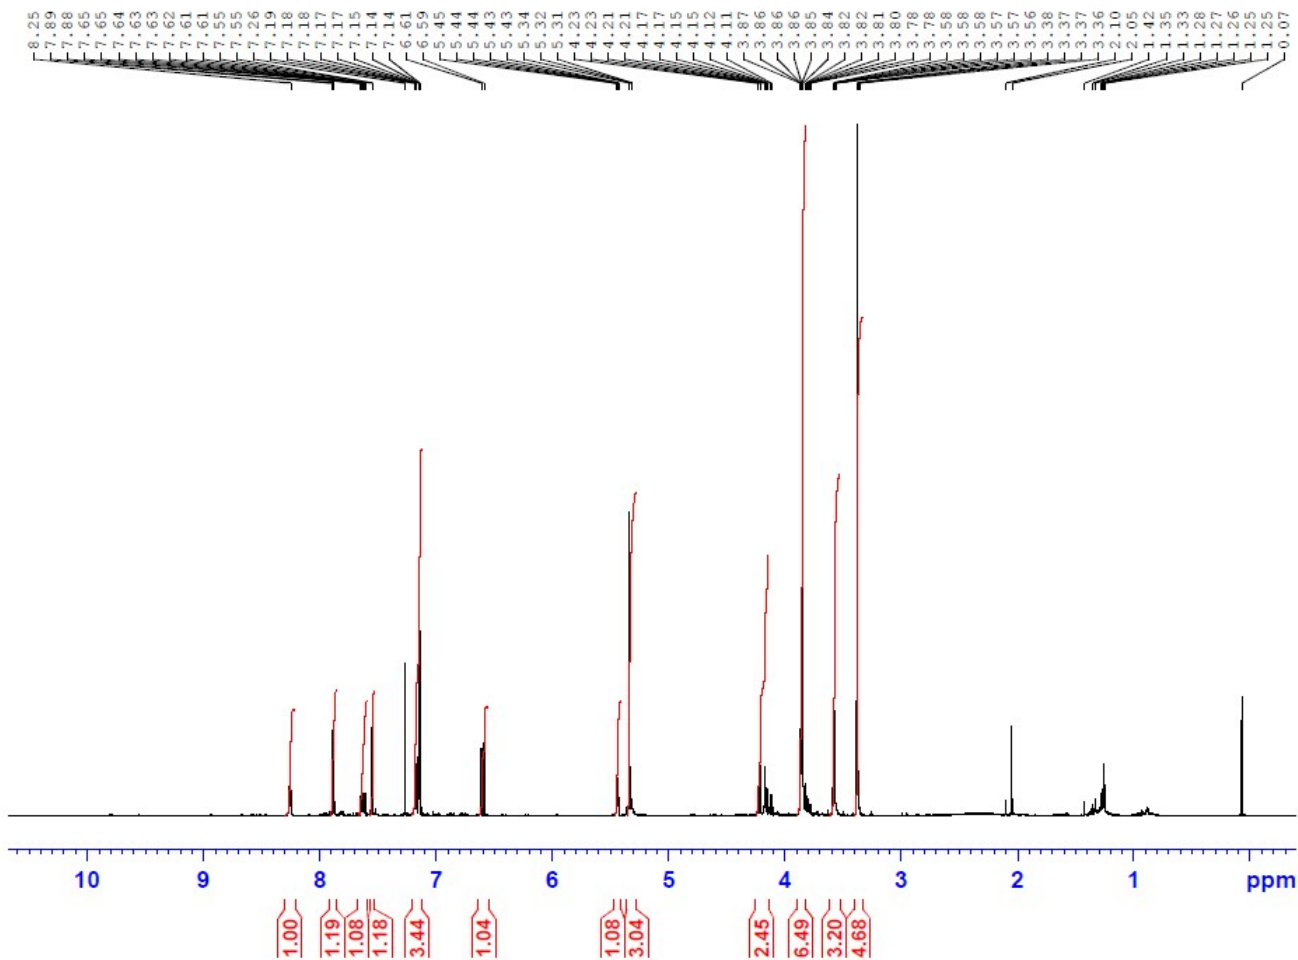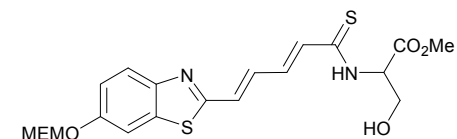

14

```

Current Data Parameters
NAME      hg894col
EXPNO    10
PROCNO   1

F2 - Acquisition Parameters
Date_    20160120
Time     12.53
INSTRUM  AV600
PROBHD   5 mm CPDCH 13C
PULPROG  zg30
TD       98682
SOLVENT  CDCl3
NS       4
DS       0
SWH      12335.526 Hz
FIDRES   0.125003 Hz
AQ       3.9999104 sec
RG       40.3
DW       40.533 usec
DE       11.48 usec
TE       298.0 K
D1       1.0000000 sec
TDO      1

----- CHANNEL f1 -----
SFO1     600.1337061 MHz
NUC1      1H
P1       11.40 usec
PLW1     13.76731014 W

F2 - Processing parameters
SI       131072
SF       600.1300116 MHz
WDW      no
SSB      0
LB       0 Hz
GB       0
PC       1.40
  
```

hg894col  
C13\_DayTime.ucl CDCI3 {W:\600} jca 53

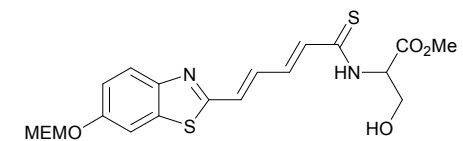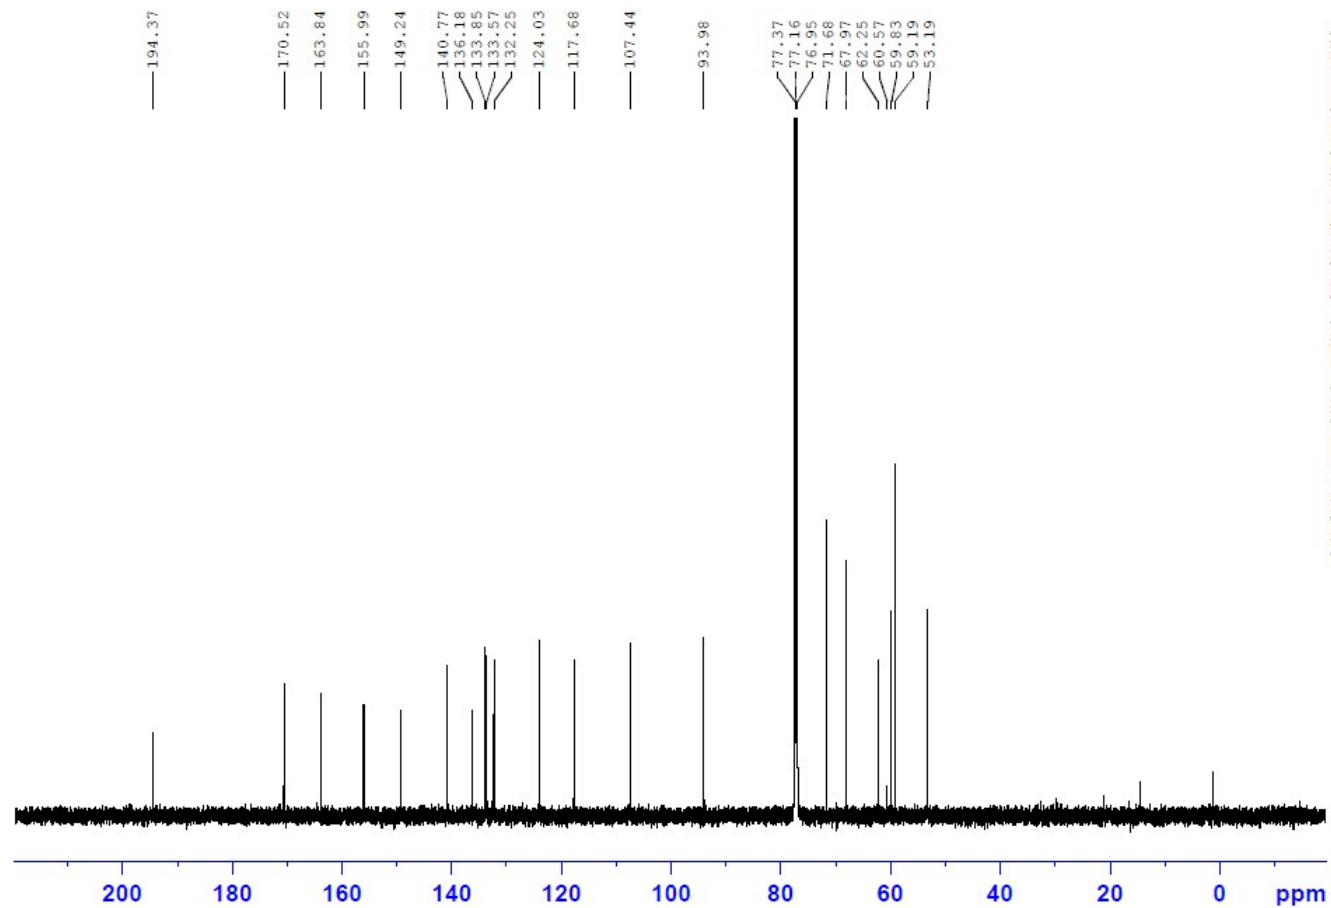

```

Current Data Parameters
NAME      hg894col
EXPNO     11
PROCNO    1

F2 - Acquisition Parameters
Date_     20160120
Time      12.56
INSTRUM   AV600
PROBHD    5 mm CPDCH 13C
PULPROG   zgpg30
TD         71914
SOLVENT   CDCl3
NS         32
DS         4
SWH        36057.691 Hz
FIDRES     0.501400 Hz
AQ         0.9972075 sec
RG         203
DW         13.867 usec
DE         19.08 usec
TE         298.0 K
D1         1.79999995 sec
D11        0.03000000 sec
TDO        2

----- CHANNEL f1 -----
SFO1      150.9178981 MHz
NUC1      13C
P1         9.80 usec
PLW1      26.76899910 W

----- CHANNEL f2 -----
SFO2      600.1324005 MHz
NUC2      1H
CPDPRG2   waltz16
PCPD2     70.00 usec
PLW2      13.76700020 W
PLW3      0.85130001 W
PLW13     0.17892000 W

F2 - Processing parameters
SI         65536
SF         150.9027930 MHz
WDW        EM
SSB        0
LB         1.00 Hz
GB         0
PC         1.40
  
```

hg900col  
 PROTON.ucl CDC13 {W:\600} jca 11

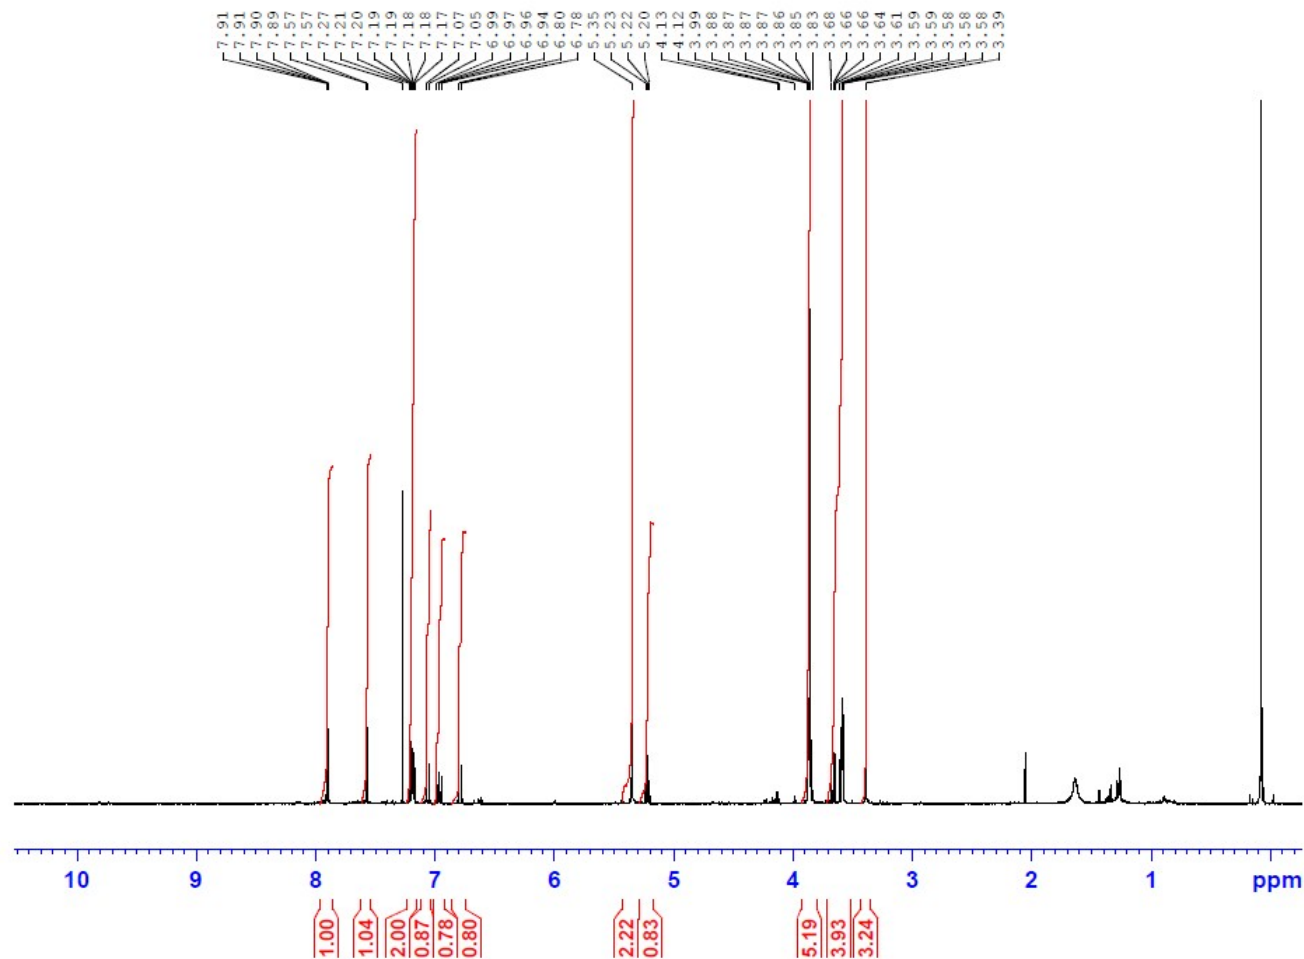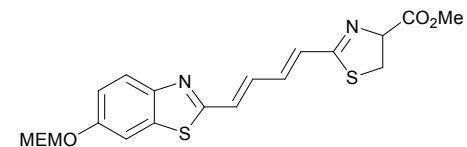

15

```

Current Data Parameters
NAME      HG900col
EXPNO     10
PROCNO    1

F2 - Acquisition Parameters
Date_     20160128
Time      11.28
INSTRUM   AV600
PROBHD    5 mm CPDCH 13C
PULPROG   zg30
TD         98682
SOLVENT   CDC13
NS         4
DS         0
SWH        12335.526 Hz
FIDRES     0.125003 Hz
AQ         3.9999104 sec
RG         40.3
DW         40.533 usec
DE         11.48 usec
TE         298.0 K
D1         1.0000000 sec
TDO        1

----- CHANNEL f1 -----
SFO1      600.1337061 MHz
NUC1       1H
P1         11.40 usec
PLW1      13.76731014 W

F2 - Processing parameters
SI         131072
SF         600.1300096 MHz
WDW        no
SSB        0
LB         0 Hz
GB         0
PC         1.40
  
```



hg900col  
C13\_DayTime.ucl CDCI3 {W:\600} jca 11

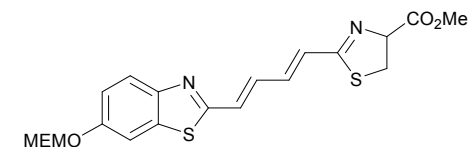

15

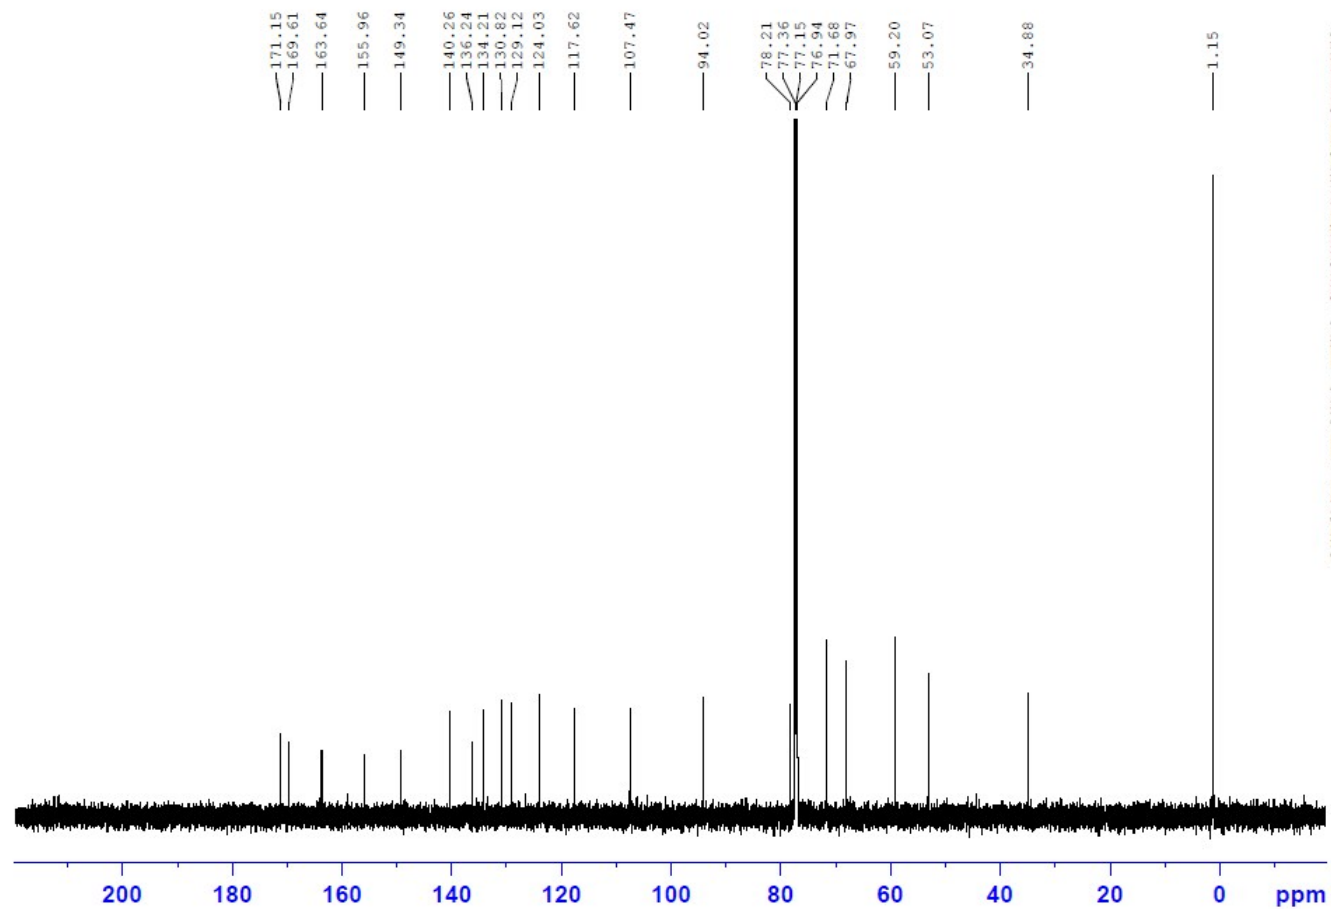

```
Current Data Parameters
NAME      HG900col
EXPNO     11
PROCNO    1

F2 - Acquisition Parameters
Date_     20160128
Time      11.32
INSTRUM   AVS00
PROBHD    5 mm CPDCH 13C
PULPROG   zgpg30
TD         71914
SOLVENT   CDCl3
NS         16
DS         4
SWH        36057.691 Hz
FIDRES     0.501400 Hz
AQ         0.9972075 sec
RG         203
DW         13.867 usec
DE         19.08 usec
TE         298.0 K
D1         1.7999995 sec
D11        0.03000000 sec
TDO        2

----- CHANNEL f1 -----
SFO1      150.9178981 MHz
NUC1       13C
P1         9.80 usec
PLW1      26.76899910 W

----- CHANNEL f2 -----
SFO2      600.1324005 MHz
NUC2       1H
CPDPRG2   waltz16
PCPD2     70.00 usec
PLW2      13.76700020 W
PLW12     0.8513001 W
PLW13     0.17892000 W

F2 - Processing parameters
SI         65536
SF         150.9027930 MHz
WDW        EM
SSB        0
LB         1.00 Hz
GB         0
PC         1.40
```

hg501-2  
 PROTON.ucl MeOD {V:\Bruker\TOPSPIN} jca 36

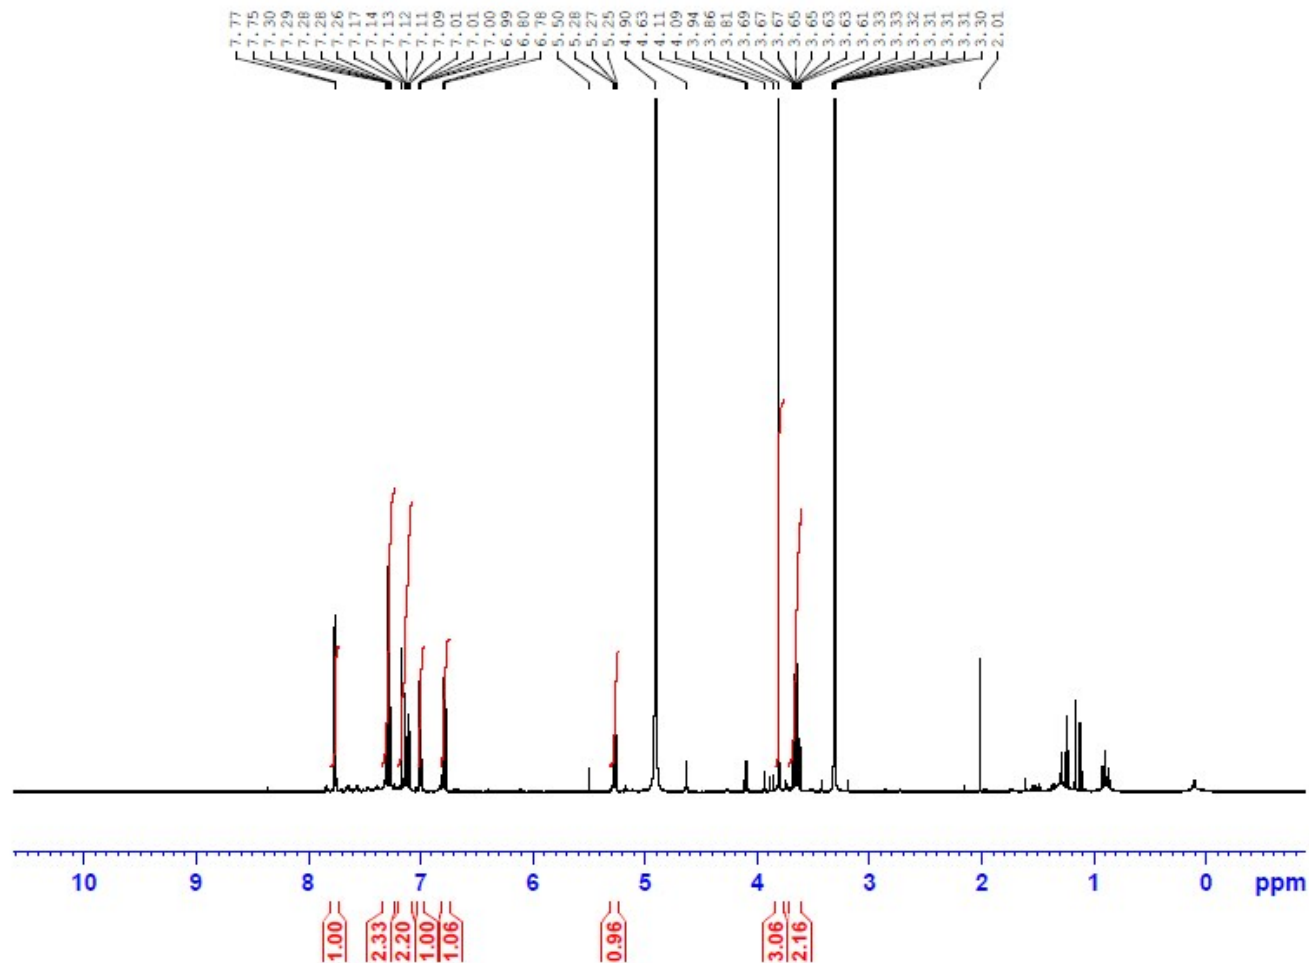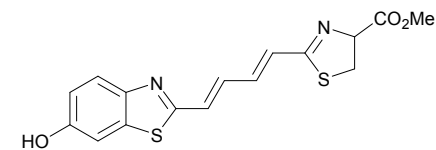

16

Current Data Parameters  
 NAME NMR  
 EXPNO 60  
 PROCNO 1

F2 - Acquisition Parameters  
 Date\_ 20120713  
 Time 11.50  
 INSTRUM AV600  
 PROBHD 5 mm CPDCH 13C  
 PULPROG zg30  
 TD 50482  
 SOLVENT MeOD  
 NS 8  
 DS 0  
 SWH 12335.526 Hz  
 FIDRES 0.125003 Hz  
 AQ 3.9999104 sec  
 RG 40.3  
 CW 40.533 usec  
 DE 10.46 usec  
 TE 298.0 K  
 D1 1.00000000 sec  
 TDO 1

===== CHANNEL f1 =====  
 NUCL1 1H  
 P1 11.40 usec  
 PL1 1.00 dB  
 PL1W 13.76731014 W  
 SFO1 600.1337061 MHz

F2 - Processing parameters  
 SI 32768  
 SF 600.1300141 MHz  
 SCW SM  
 SSB 0  
 LB 0.30 Hz  
 GB 0  
 PC 1.40

hg501-2  
 C13CPD.ucl MeOD (V:\Bruker\TOPSPIN) jca 36

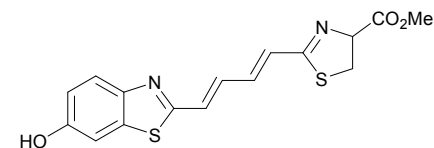

16

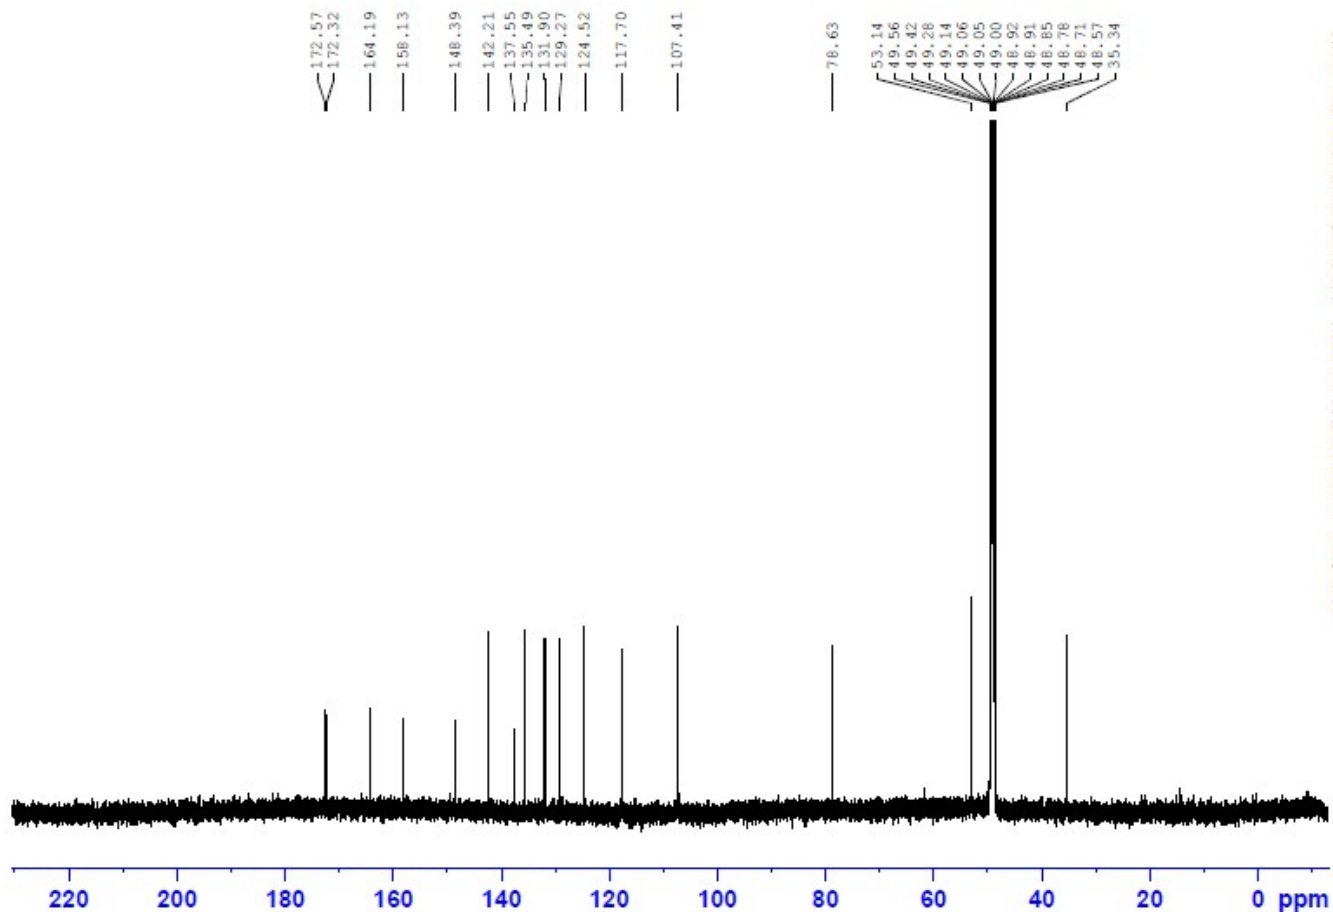

```

Current Data Parameters
NAME          MMR
EXPNO        62
PROCNO       1

F2 - Acquisition Parameters
Date_         20120713
Time          13.30
INSTRUM      AV650
PROBHD       5 mm CPDCH 13C
PULPROG      zgpg30
TD            70358
SOLVENT      MeOD
NS            128
DS            0
SWH           39062.500 Hz
FIDRES       0.555591 Hz
AQ            0.8999424 sec
RG            1030
DNF           12.800 usec
DE            21.12 usec
TE            298.0 K
D1            2.0000000 sec
D11           0.0300000 sec
TD0           1

===== CHANNEL f1 =====
NUC1          13C
P1            9.80 usec
PL1           5.00 dB
PL1W          26.76886177 W
SFO1          150.9201628 MHz

===== CHANNEL f2 =====
CPDPRG2      waltz16
NUC2          1H
PCPD2        70.00 usec
PL2           1.00 dB
PL12         17.23 dB
PL13         20.00 dB
PL1W          13.76731014 W
PL1W         0.32798135 W
PL1W         0.11312016 W
SFO2          600.1324005 MHz

F2 - Processing parameters
SI            65536
SF            150.9025980 MHz
WDW           EM
SSB           0
LB            1.00 Hz
GB            0
PC            1.40
  
```

Solvent suppression of largest peak (H<sub>2</sub>O).

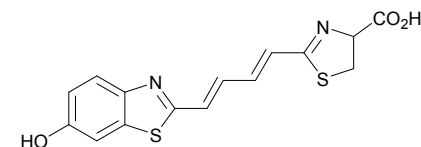

5

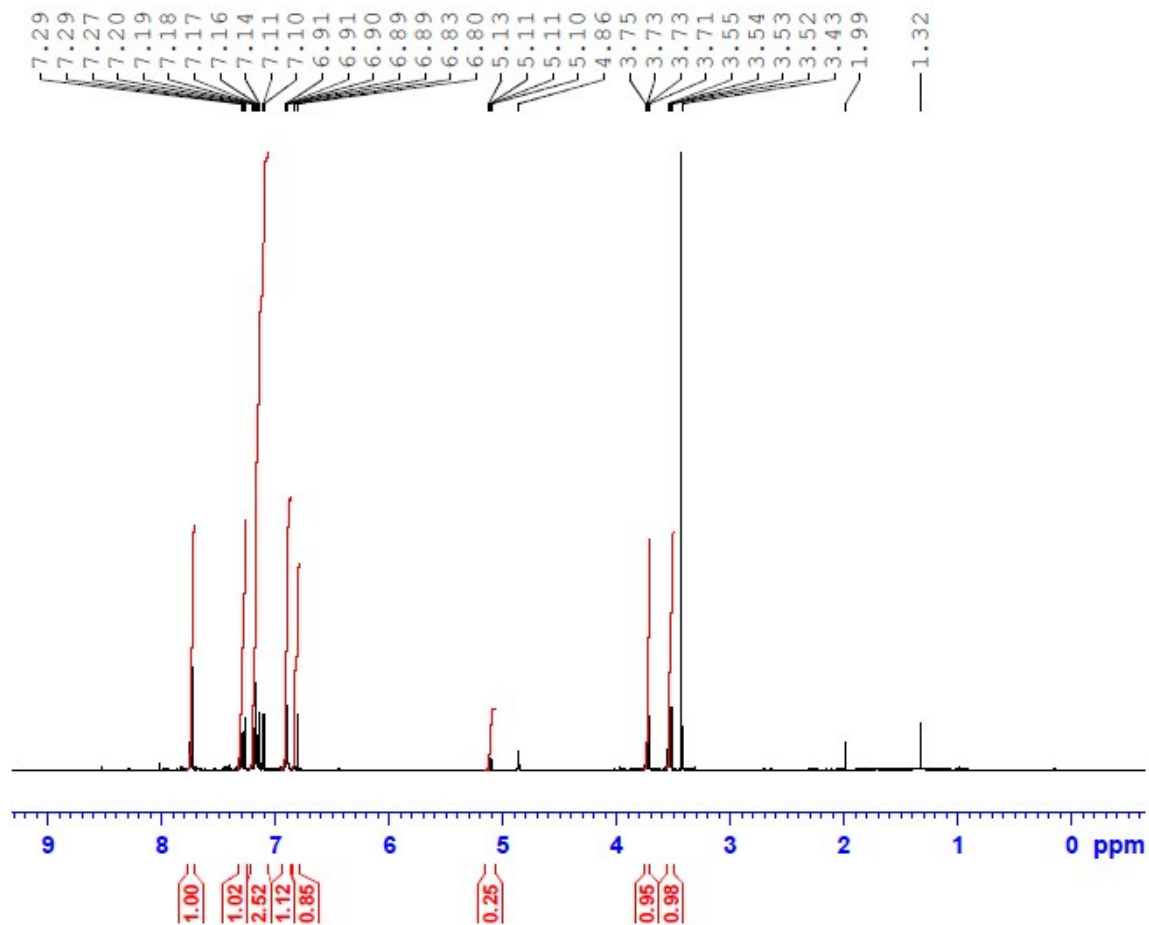

```

Current Data Parameters
NAME      hg932
EXPNO    10
PROCNO   1

F2 - Acquisition Parameters
Date_    20160608
Time     11.41
INSTRUM  AV600
PROBHD   5 mm CPDCH 13C
PULPROG  noesypprgd
TD       144228
SOLVENT  D2O
NS       8
DS       0
SWH      18028.846 Hz
FIDRES   0.125002 Hz
AQ       3.9999232 sec
RG       1030
DW       27.733 usec
DE       40.73 usec
TE       303.0 K
D1       4.00000000 sec
D8       0.01000000 sec
D12      0.00020000 sec
D16      0.00020000 sec
TD0      1
ZGPTNS   -DFLAG_BLK

----- CHANNEL f1 -----
SFO1     600.1328217 MHz
NUC1     1H
P0       11.43 usec
P1       11.43 usec
PLW1     13.76700020 W
PLWS     0.00001800 W

----- GRADIENT CHANNEL -----
GPNAM[1] SMSQ10.100
GPNAM[2] SMSQ10.100
GP21     50.00 %
GP22     -10.00 %
P16      1000.00 usec

F2 - Processing parameters
SI       131072
SF       600.1299052 MHz
WDW      EM
SSB      0
LB       0.30 Hz
GB       0
PC       1.00
    
```

C13\_DayTime.ucl D2O {W:\600} jca 44

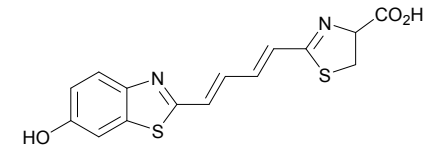

5

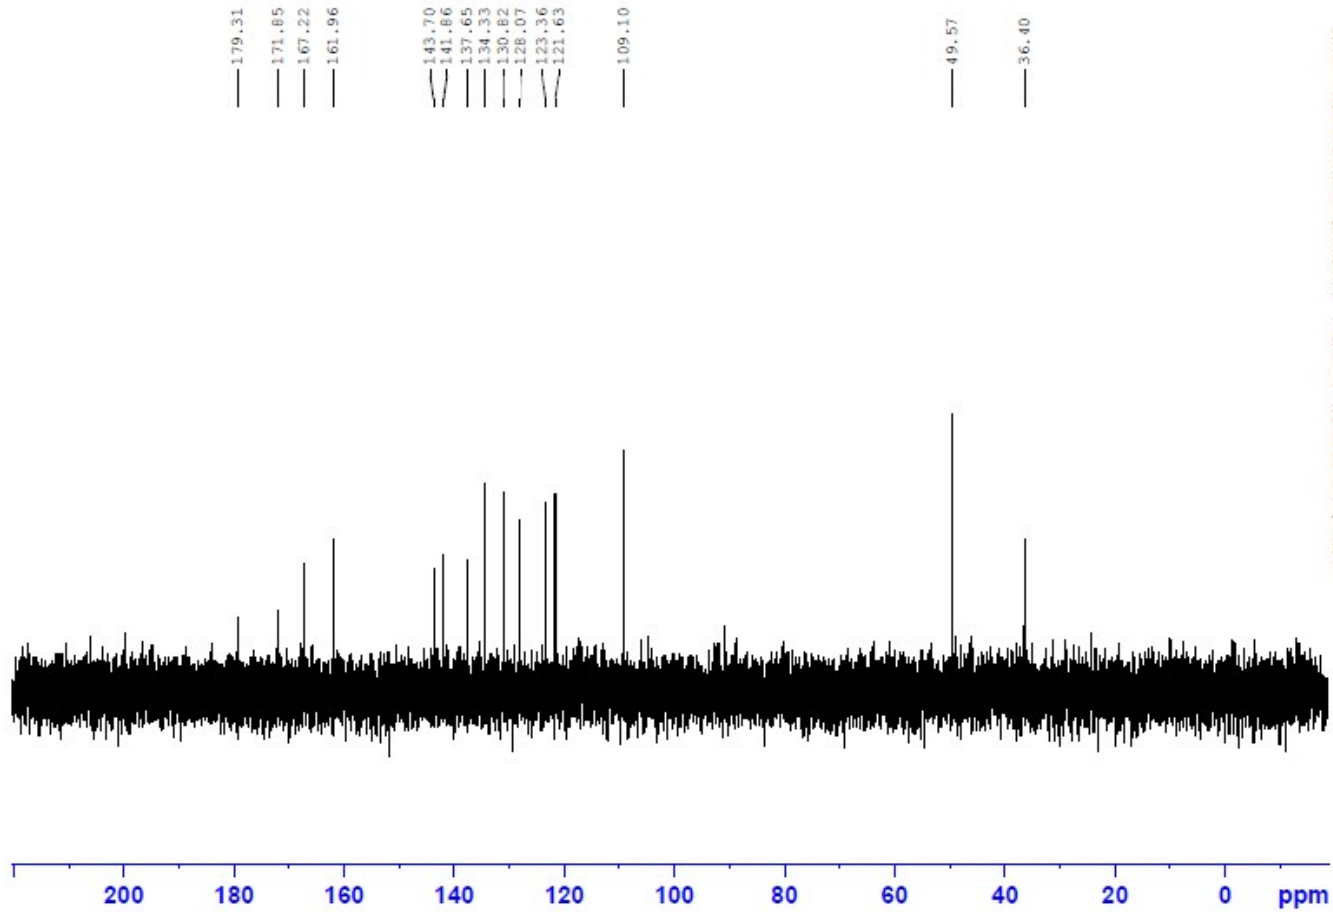

```
Current Data Parameters
NAME          hg932
EXPNO         14
PROCNO        1

F2 - Acquisition Parameters
Date_         20160608
Time          13.11
INSTRUM       AV600
PROBHD        5 mm CPDCH 13C
PULPROG       zgpg30
TD            71914
SOLVENT       D2O
NS            512
DS            4
SWH           36257.691 Hz
FIDRES        0.501400 Hz
AQ            0.9972075 sec
RG            1150
DNF           13.867 usec
DE            19.08 usec
TE            303.0 K
D1            1.7999995 sec
D11           0.03000000 sec
TD0           1

===== CHANNEL #1 =====
SFO1          150.9178961 MHz
NUC1          13C
P1            9.80 usec
P1M1          26.76899910 W

===== CHANNEL #2 =====
SFO2          600.1324005 MHz
NUC2          1H
CPCPRG2       waltz16
PCPD2         70.00 usec
P2M2          13.76700020 W
P2M12         0.36813051 W
P2M13         0.17892000 W

F2 - Processing parameters
SI            65536
SF            150.9026985 MHz
WDW           EM
SSB           0
LB            1.00 Hz
GB            0
PC            1.40
```
